1 *Short title:* Ascorbate deficiency and NPQ in *Chlamydomonas*

2

3 *Corresponding author:*

4 **Szilvia Z. Tóth**

5 ORCID: <https://orcid.org/0000-0003-3419-829X>

6 e-mail: toth.szilviazita@brc.mta.hu

7

8 *Title:*

9 **Ascorbate deficiency does not limit non-photochemical quenching in *Chlamydomonas***

10 ***reinhardtii***

11

12 *Authors:*

13 **André Vidal-Meireles<sup>1</sup>, Dávid Tóth<sup>1,2</sup>, László Kovács<sup>1</sup>, Juliane Neupert<sup>3</sup>, Szilvia Z.**

14 **Tóth<sup>1\*</sup>**

15

16 <sup>1</sup>Institute of Plant Biology, Biological Research Centre, Szeged, Hungary

17 <sup>2</sup>Doctoral School of Biology, University of Szeged, Szeged, Hungary

18 <sup>3</sup>Max-Planck Institut für Molekulare Pflanzenphysiologie, Potsdam-Golm, Germany

19

20 *One-sentence summary:*

21 In *Chlamydomonas* -in contrast to seed plants-, ascorbate is not required for violaxanthin

22 deepoxidation and energy-dependent non-photochemical quenching but it mitigates

23 photoinhibitory quenching.

24

25

26

27 *Footnotes:*

28 *Author contributions:* A. V.-M., J. N. and D. T. characterized the *Crvtc2-1* mutant and  
29 generated the complementation lines. L. K. developed the carotenoid content determination  
30 method. A. V.-M. performed the chl *a* fluorescence measurements, western blot analyses, and  
31 ascorbate content measurements. S. Z. T. conceived the study, analyzed the data and wrote  
32 the paper. A. V.-M. L. K. and J. N. contributed to analyzing the data and to the writing of the  
33 paper.

34

35 *Funding:*

36 This work was supported by the Lendület/Momentum Programme of the Hungarian Academy  
37 of Sciences (LP-2014/19), the National, Research and Development Office (NN 114524,  
38 GINOP-2.3.2-15-2016-00026) and the Alexander von Humboldt Foundation (grants to S Z  
39 T). A V-M received fellowships from the SEB / Company of Biologists Travel Fund, US  
40 DOE Travel Award and from the International Society of Photosynthesis Research  
41 (sponsored by Wiley on behalf of Plant, Cell and Environment).

42

43 *Email address of author for contact:*

44 [toth.szilviazita@brc.hu](mailto:toth.szilviazita@brc.hu) (Szilvia Z. Tóth)

## 45 **Summary**

46

47 Ascorbate (vitamin C) plays essential roles in development, signaling, hormone biosynthesis,  
48 regulation of gene expression, stress resistance and photoprotection. In vascular plants,  
49 violaxanthin de-epoxidase (VDE) requires ascorbate (Asc) as reductant, thereby it is required  
50 for the energy-dependent component of non-photochemical quenching (NPQ). In order to  
51 assess the role of Asc in NPQ in green algae, which are known to contain low amounts of  
52 Asc, we searched for an insertional *Chlamydomonas reinhardtii* mutant affected in the *VTC2*  
53 gene, essential for Asc biosynthesis. The *Crvtc2-1* knockout mutant was viable and,  
54 depending on the growth conditions, it contained 10 to 20% Asc relative to its wild type.  
55 When *Chlamydomonas* was grown photomixotrophically at moderate light, the zeaxanthin-  
56 dependent component of NPQ emerged upon strong red illumination both in the *Crvtc2-1*  
57 mutant and in its wild type. Deepoxidation was unaffected by Asc deficiency, demonstrating  
58 that the Chlorophycean VDE found in *Chlamydomonas* does not require Asc as a reductant.  
59 The rapidly induced, energy-dependent NPQ component, characteristic of photoautotrophic  
60 *Chlamydomonas* cultures grown at high light, was not limited by Asc deficiency either. On  
61 the other hand, a reactive oxygen species-induced photoinhibitory NPQ component was  
62 greatly enhanced upon Asc deficiency, both under photomixotrophic and photoautotrophic  
63 conditions. These results demonstrate that Asc has distinct roles in NPQ formation in  
64 *Chlamydomonas* than in vascular plants.

## 65 **Introduction**

66

67 Ascorbate is a multifunctional metabolite, essential for a range of cellular processes in green  
68 plants, including cell division, stomatal movement, the synthesis of various plant hormones,  
69 epigenetic regulation and reactive oxygen species (ROS) scavenging (Asada, 2006; Foyer and  
70 Shigeoka, 2011; Smirnoff, 2018). Within the chloroplast, Asc may also act as an alternative  
71 electron donor to photosystem II (PSII) and to PSI (Ivanov et al., 2007; Tóth et al., 2009;  
72 Tóth et al., 2011). In vascular plants, violaxanthin de-epoxidase (VDE) requires ascorbate as  
73 reductant, thereby Asc plays an essential role in the process of non-photochemical quenching  
74 (NPQ) to dissipate excess energy as heat (Bratt et al., 1995; Saga et al., 2010; Hallin et al.,  
75 2016).

76 In order to fulfill the multiple physiological roles of Asc (reviewed by Tóth et al.,  
77 2018; Smirnoff, 2018), vascular plants maintain their Asc concentration at a high,  
78 approximately 20 to 30 mM level (Zechmann et al., 2011), which is also relatively constant,  
79 usually with no more than two-fold increase upon stress treatments and moderate decrease  
80 during dark periods (Dowdle et al., 2007). Notwithstanding, Asc concentration may be  
81 limiting under environmental stress conditions, as shown by an increased oxidative stress  
82 tolerance of plants overexpressing dehydroascorbate reductase, playing an essential role in  
83 Asc regeneration (Wang et al., 2010). Regarding NPQ, it was shown that Asc-deficient  
84 Arabidopsis plants have slowly inducible and diminished NPQ, whereas Asc-overproducing  
85 plants possess enhanced NPQ relative to wild type plants, meaning that Asc may limit the  
86 conversion of violaxanthin to zeaxanthin *in vivo* (Müller-Moulé et al., 2002; Tóth et al.,  
87 2011). Ascorbate deficient plants are also sensitive to high light, especially in combination  
88 with zeaxanthin deficiency (Müller-Moulé et al., 2003).

89           Green algae, for instance *Chlamydomonas reinhardtii*, produce Asc in a very small  
90 amount under favorable environmental conditions (approx. 100 to 400  $\mu$ M, Gest et al., 2013),  
91 and boost it only in case of need, for instance upon a sudden increase in light intensity and in  
92 nutrient deprivation (Vidal-Meireles et al., 2017; Nagy et al., 2018). The mode of regulation  
93 of Asc biosynthesis differs largely between plants and *Chlamydomonas*: in contrast to  
94 vascular plants, i) green algal Asc biosynthesis is directly regulated by ROS, ii) it is not under  
95 circadian clock control and, iii) instead of a negative feedback regulation, there is a  
96 feedforward mechanism on the expression of the key Asc biosynthesis gene, *VTC2*  
97 (*Cre13.g588150*) by Asc in the physiological concentration range (Vidal-Meireles et al.,  
98 2017).

99           Regarding NPQ, it was described that the violaxanthin deepoxidase found in  
100 Chlorophyceae (CVDE) is not homologous to plant VDE but related to a lycopene cyclase of  
101 photosynthetic bacteria (Li et al., 2016a). *Chlamydomonas* CVDE (CrCVDE), encoded by  
102 *Cre04.g221550*, has a FAD-binding domain and it is located on the stromal side and not in  
103 the thylakoid lumen, as it is the case for plant-type VDE (Li et al., 2016a). The cofactor or  
104 reductant requirement of the CrCVDE enzyme has not been investigated, and it is not known  
105 whether its activity requires Asc, either directly or indirectly.

106           Due to the major differences in Asc contents, the regulation of Asc biosynthesis and  
107 the VDE enzymes of vascular plants and Chlorophyceae, we decided to assess the role of Asc  
108 in the various NPQ components in *Chlamydomonas reinhardtii*. To this end, we characterized  
109 an insertional *VTC2* mutant procured from the CLiP library (Li et al., 2016b), possessing only  
110 10 to 20% Asc relative to its parent strain. We have found that, in contrast to vascular plants,  
111 Asc deficiency does not limit energy-dependent quenching (qE) and violaxanthin de-  
112 epoxidation in *Chlamydomonas*; instead, Asc deficiency leads to enhanced photoinhibitory  
113 quenching (qI) upon excessive illumination.

114

## 115 **Results**

116

117 *Identification and initial characterization of an Asc-deficient VTC2 insertional mutant of C.*  
118 *reinhardtii and its genetic complementation*

119 To investigate the function of Asc in NPQ in *C. reinhardtii*, we searched for insertion  
120 mutants for the *VTC2* gene in the CLiP library (Li et al., 2016b). We found one putative  
121 *VTC2* mutant (strain *LMJ.RY0402.058624*, hereafter called *Crvtc2-1*), holding one insertion  
122 of the paromomycin resistance (CIB1) cassette at the junction site of exon 3 and the adjacent  
123 upstream intron of the *VTC2* gene (Fig. 1A). The other available mutants were affected in the  
124 3'UTR region of the *VTC2* gene and/or had multiple insertions in genes other than *VTC2*.  
125 One of the strains carrying a CIB1 cassette in the 3'UTR region of the *VTC2* gene with an  
126 insertion confidence of 95% (*LMJ.RY0402.146784*) was tested, but we found that it had wild-  
127 type level Asc content (data not shown); therefore, it was not used for further analyses. Due  
128 to the lack of another, independent CIB insertional mutant line affecting only the *VTC2* gene,  
129 we carried out several NPQ measurements on our previously published *VTC2*-amiRNA line  
130 (Vidal-Meireles et al., 2017) to confirm our findings on the consequences of Asc deficiency  
131 on NPQ (see below).

132 The site of CIB1 cassette integration in the CLiP mutants had been validated by LEAP-  
133 Seq method (Li et al., 2016b), and we verified it in the *Crvtc2-1* mutant by PCR (Fig. 1B).  
134 Using primers annealing upstream the predicted insertion site in *VTC2*, a specific 852 bp  
135 fragment was observed in genomic DNA samples isolated from wild type *C. reinhardtii* cells  
136 (CC-4533) and from the *Crvtc2-1* mutant strain (Fig. 1B, top panel); using primers designed  
137 to amplify the 5' and 3' junction sites of the CIB1 cassette, specific 470 and 601 bp  
138 fragments could be detected in the *Crvtc2-1* mutant (Fig. 1B, middle and bottom panels).

139 Sequencing analysis of the PCR amplicons confirmed the predicted insertion of the CIB1  
140 cassette in antisense orientation with its 5' junction in the third exon of the gene and the 3'  
141 junction reaching to the adjacent intron upstream of exon 3 (Supplemental Fig. S1).

142 Under moderate light ( $100 \mu\text{mole photons m}^{-2} \text{ s}^{-1}$ ) and photomixotrophic conditions  
143 (growth in Tris-acetate-phosphate (TAP) medium), the wild type strain (CC-4533) had  
144 approx. 12 pmol Asc/  $\mu\text{g Chl(a+b)}$  (Fig. 1C), corresponding to about 200  $\mu\text{M}$  cellular Asc  
145 concentration (see Kovács et al., 2016 for calculations), and the *Crvtc2-1* mutant had a very  
146 low Asc content, only approx. 10% of the wild type. When the cultures were treated with 1.5  
147 mM  $\text{H}_2\text{O}_2$ , which had been shown to result in a strong increase in Asc content (Urzica et al.,  
148 2012; Vidal-Meireles et al., 2017), the Asc content in the wild type increased approximately  
149 three-fold, whereas in the *Crvtc2-1* mutant it did not increase (Fig. 1C). This is in contrast to  
150 the *VTC2*-amiRNA lines generated earlier, where  $\text{H}_2\text{O}_2$  treatment resulted in noticeable Asc  
151 accumulation (Vidal-Meireles et al., 2017).

152 Via real time qRT-PCR analysis with primers located upstream and downstream of  
153 the insertion site of the CIB1 cassette no *VTC2* transcript could be detected in the *Crvtc2-1*  
154 mutant samples, grown under normal growth conditions or treated with  $\text{H}_2\text{O}_2$  (Fig. 1D).  
155 Similarly, in qRT-PCR analysis using primers spanning the sequence encoding the catalytic  
156 site of *VTC2* (which is located downstream of the CIB1 cassette insertion site), no transcript  
157 could be detected in the *Crvtc2-1* mutant under normal growth conditions, and only a weak  
158 signal could be observed upon 35 PCR cycles in the  $\text{H}_2\text{O}_2$ -treated *Crvtc2-1* mutant samples  
159 (Fig. 1E).

160 In order to confirm that the decrease in Asc content is caused by the functional  
161 deletion of *VTC2* in the insertional mutant strain, genetic complementation was carried out.  
162 To this end, we transformed the *Crvtc2-1* insertional mutant with the coding sequence of  
163 *VTC2*, controlled by the constitutive promoter *PsaD*. The plasmid used for transformation

164 included the *APH7* resistance gene (Fig. 2A), thus the ability to grow on a medium  
165 containing hygromycin-B was used as the first screening method for successful  
166 transformation.

167 The integration of the plasmid in the genome was verified by PCR. Using a forward  
168 primer annealing to the *PSAD* promoter region and a reverse primer annealing to the 5' end  
169 of the *VTC2* coding sequence, a specific 841 bp fragment could be amplified in genomic  
170 DNA samples isolated from two independent complementation lines of *Crvtc2-1+VTC2* (Fig.  
171 2B). The *VTC2* transcript could be detected in the complemented *Crvtc2-1+VTC2* lines via  
172 qRT-PCR analysis with primers spanning the sequence encoding the catalytic site (Fig. 2C).  
173 The Asc content of the complementation lines were restored to a great extent (Fig. 2D). The  
174 cell volume, the cellular Chl content and *Chla/b* ratios were moderately increased in the  
175 *Crvtc2-1* mutant relatively to the wild type and these parameters were partially restored upon  
176 complementation (Supplemental Fig. S2A, B, C).

177 Regarding the growth phenotypes, no significant difference was observed between the  
178 strains when grown in TAP medium at 100  $\mu\text{mole photons m}^{-2} \text{ s}^{-1}$ , whereas the growth of the  
179 *Crvtc2-1* mutant was severely inhibited in TAP medium at 530  $\mu\text{mole photons m}^{-2} \text{ s}^{-1}$ , which  
180 was restored upon genetic complementation. In HSM medium at 530  $\mu\text{mole photons m}^{-2} \text{ s}^{-1}$   
181 growth was slow in all genotypes and no significant differences were observed among them  
182 (Supplemental Fig. S2D). The Asc content increased two- to three-fold in each strains upon  
183 high light treatment, and the Asc content of the *Crvtc2-1* mutant remained at a level of 10-  
184 20% relative to the wild type and the complementation lines (Supplemental Fig. S2E).

185

186 *The effects of Asc deficiency on NPQ in cultures grown at normal light and photomixotrophic*  
187 *conditions*



188 NPQ includes short-term responses to changes in light intensity, as well as responses that  
189 occur over longer periods allowing for acclimation to high light exposure. In *C. reinhardtii*,  
190 the levels of the different NPQ components are variable and highly dependent on the growth  
191 conditions (Niyogi et al., 1997; Finazzi et al., 2006; Iwai et al., 2007; Peers et al 2009).

192 In a first set of experiments to assess the effects of Asc deficiency on NPQ,  
193 Chlamydomonas strains were cultured in TAP medium, at 100  $\mu\text{mol photons m}^{-2} \text{s}^{-1}$ . Before  
194 the NPQ measurements, cultures were dark-adapted for about 30 min with shaking in order to  
195 avoid anaerobiosis; this dark adaptation protocol ensures the relaxation of most NPQ  
196 processes and the separation of the NPQ components induced under high light illumination  
197 (Roach and Na, 2017). When subjecting the cells to continuous red light of 530  $\mu\text{mol photons}$   
198  $\text{m}^{-2} \text{s}^{-1}$ , a small, rapidly induced NPQ component was induced in the wild type and the Asc-  
199 deficient *Crvtc2-1* strain in the first 2 min (Fig. 3A), that we attribute to energy-dependent  
200 component (qE). qE is activated by low lumen pH, which occurs for instance during the  
201 induction of photosynthesis and upon CO<sub>2</sub> limitation of the Calvin-Benson-Bassham cycle  
202 (Kanazawa and Kramer, 2002; Takizawa et al., 2008). In *C. reinhardtii*, qE formation also  
203 requires zeaxanthin or lutein (Ericksson et al., 2015) and it is enhanced by a stress-related  
204 LHC protein, LHCSR3, which is strongly expressed when algae are grown at high light (Xue  
205 et al., 2015; Peers et al., 2009; Bonente et al., 2011; Chaux et al., 2017). At moderate light  
206 (100  $\mu\text{mol photons m}^{-2} \text{s}^{-1}$ ) and photomixotrophic growth conditions, LHCSR3 level was  
207 relatively low, particularly in the *Crvtc2-1* strain (Supplemental Fig. S3). The presence of  
208 acetate also enables high Calvin-Benson-Bassham cycle activity and a relatively low qE  
209 (Johnson and Alric, 2012), in agreement with our findings.

210 A slower NPQ component, induced on the timescale of several minutes was also  
211 present, which was enhanced in the Asc-deficient *Crvtc2-1* mutant (Fig. 3A) and restored in  
212 its complementation strains (Supplemental Fig. S4A). This slow component was enhanced in

213 our previously published *VTC2*-amiRNA line relative to its control strain as well  
214 (Supplemental Fig. S4C).

215 Three components may be responsible for this slowly induced NPQ component (see  
216 Ericksson et al., 2015; Allorete et al., 2013): i) zeaxanthin dependent quenching, which may  
217 act on NPQ directly (e.g. Holt et al., 2005; Holub et al., 2007; Avenson et al., 2008) or  
218 indirectly by controlling the sensitivity of qE to the pH gradient or promoting conformational  
219 changes within LHCs (e.g. Johnson et al., 2008; Ruban et al., 2012); ii) State transition-  
220 dependent quenching (qT), which may contribute to balancing excitation energy between  
221 PSII and PSI via LHCII phosphorylation and antenna dissociation from PSII (Depège, 2003;  
222 Lemeille et al., 2009; Ünlü et al., 2014); iii) A slowly relaxing, “photoinhibitory” quenching  
223 (qI), associated with photosystem II (PSII) damage or slowly reversible downregulation of  
224 PSII representing a continuous form of photoprotection (Adams et al. 2013; Tikkanen et al.,  
225 2014).

226 In order to decipher the origin of the slow NPQ component and to study the possible  
227 role of Asc in NPQ, carotenoids were analyzed first, using HPLC. Upon illumination, the de-  
228 epoxidation index largely increased (from about 0.05 to 0.25) both in the CC-4533 (wild  
229 type) strain and the *Crvtc2-1* mutant, and de-epoxidation only moderately recovered after the  
230 cessation of actinic illumination in both strains (Fig. 3B). Violaxanthin, antheraxanthin and  
231 zeaxanthin concentrations were essentially the same in the *Crvtc2-1* mutant and in the wild  
232 type (Supplemental Fig. S5A, B, C). These results suggest that qZ was partially responsible  
233 for the slow NPQ component and that Asc deficiency does not limit the de-epoxidation  
234 reaction. We also found that the amounts of  $\beta$ -carotene and lutein were not affected by the  
235 lack of Asc and their quantities remained constant during the entire protocol (Supplemental  
236 Fig. S5D, E). The  $F_V/F_M$  values of dark-adapted cultures and those subjected to high light

237 illumination followed by a recovery period were also very similar, with no major differences  
238 between the Asc-deficient mutant and the CC-4533 strain (Fig. 3C).

239 Since the de-epoxidation ratios were the same in the CC-4533 strain and in the  
240 *Crvtc2-1* mutant (Fig. 3B), it is likely that Asc-deficiency does not limit the reaction. In order  
241 to completely exclude this possibility, a 16-h dark acclimation experiment was carried out,  
242 ensuring undetectably low level of Asc (Fig. 4A). Still, NPQ was induced slowly upon  
243 illumination (Fig. 4B), and the de-epoxidation indices were similar than in cultures subjected  
244 to relatively short dark adaptation (compare Fig. 4C and Fig. 3B); we note that during a 30-  
245 min illumination Asc does not accumulate (Vidal-Meireles et al., 2017).

246 The large increase in the de-epoxidation index upon illumination suggests that qZ is at  
247 least partially responsible for the slow NPQ component. However, we also observed that the  
248 slow NPQ component was larger in the *Crvtc2-1* mutant than in the wild type, whereas the  
249 de-epoxidation ratios were the same (Fig. 3A, B). In addition to qZ, qT and qI mechanisms  
250 may also contribute to the slow component and they may differ between the wild type and the  
251 *Crvtc2-1* mutant. The possible contribution of qT was studied by measuring 77K  
252 fluorescence spectra: Upon illumination with 530  $\mu\text{mole photons m}^{-2}\text{s}^{-1}$  red light, the 684  
253 nm/710 nm ratio remained unaltered in the wild type and increased slightly in the Asc-  
254 deficient mutant (Fig. 3D). Transition from state I to state II would decrease the 684/710 nm  
255 ratio, therefore, in our cultures grown at moderate light in TAP medium and subjected to  
256 strong red illumination during the fluorescence measurement, qT is unlikely to contribute to  
257 NPQ induction. On the other hand, when the actinic illumination was switched off, the  
258 684/710 nm ratio decreased moderately, reflecting the occurrence of state I to state II  
259 transition in the dark.

260 To further study the effect of state transition in the induction and relaxation of NPQ, a  
261 state transition mutant, called *stt7-9* (Depège et al., 2003) was employed. NPQ was induced

262 during illumination in the *stt7-9* mutant to a similar extent as in the *Crvtc2-1* mutant (albeit  
263 with rather different kinetics), which coincided with a strong zeaxanthin accumulation  
264 (Supplemental Fig. S6B); this indicates that transition to state II did not play a role in the  
265 formation of NPQ under the present experimental conditions. On the other hand, upon the  
266 cessation of actinic illumination, there was a rapid NPQ relaxation in the *stt7-9* mutant,  
267 showing that transition to state II occurs in the wild types and the *Crvtc2-1* mutant in the  
268 dark, probably masking the relaxation of the other NPQ components.

269 As a next step, the effect of oxidative stress, known to enhance NPQ (Roach and Na,  
270 2017), was tested by employing H<sub>2</sub>O<sub>2</sub> and catalase treatments on the *Crvtc2-1* mutant and its  
271 wild type. Fig. 5A and B show that upon the addition of 1.5 mM H<sub>2</sub>O<sub>2</sub>, the slow NPQ  
272 component increased remarkably in both strains, without altering the de-epoxidation level  
273 (Fig. 5C). When 5 µg/ml catalase was added, NPQ was only slightly affected in the wild type  
274 (Fig. 5D), whereas it significantly decreased in the Asc-deficient mutant (Fig. 5E). These data  
275 suggest that H<sub>2</sub>O<sub>2</sub> accumulated upon strong illumination in the Asc-deficient mutant,  
276 resulting in enhanced NPQ. On the other hand, the F<sub>V</sub>/F<sub>M</sub> value, an indicator of  
277 photosynthetic efficiency, did recover following illumination and to a similar extent in the  
278 wild type and the *Crvtc2-1* strain (Fig. 3C), thus photosynthetic reaction centers did not get  
279 severely inhibited.

280 For comparison, the *npq1* mutant, lacking the CVDE enzyme, thus unable to perform  
281 violaxanthin de-epoxidation (Niyogi et al., 1997), was also tested. Upon illumination with  
282 530 µmol photons m<sup>-2</sup> s<sup>-1</sup>, this strain developed a large NPQ (Fig. 6A), which was  
283 accompanied by irreversible decrease of F<sub>V</sub>/F<sub>M</sub> and loss of Chl and β-carotene relative to its  
284 wild type (137a) strain (Fig. 6B, C, D). 77 K fluorescence recordings showed no changes in  
285 the 684nm/710nm ratio (Fig. 6E), thus the large NPQ component could be unambiguously  
286 attributed to photoinhibitory qI. Interestingly, the Asc concentration in the *npq1* mutant is

287 very high compared to the other strains (Fig. 6F), probably to compensate for the lack of  
288 CVDE and zeaxanthin in ROS management (Baroli et al., 2003). Thus, the experiments on  
289 the *npq1* mutant corroborate the importance of CVDE in strong illumination.

290

291 *The effects of Asc deficiency on NPQ in cultures grown under photoautotrophic conditions at*  
292 *high and moderate light*

293 When the cultures were grown under photoautotrophic conditions without CO<sub>2</sub>  
294 supplementation under strong white light (530 μmole photons m<sup>-2</sup>s<sup>-1</sup>), which was similar in  
295 intensity used for NPQ induction measurements, qE reached relatively high values (about  
296 1.0) both in the wild type and the Asc-deficient CLiP mutant (Fig. 7A). In the *VTC2*-amiRNA  
297 line, the qE component was enhanced relative to its empty vector control (Supplemental Fig.  
298 S4D). These results show that Asc is not required for the formation of the qE component. The  
299 qE phase was followed by a slower one, which was enhanced both in the *Crvtc2-1* mutant  
300 and the *VTC2* amiRNA line relative to their control strains.

301 During illumination, the de-epoxidation index changed only marginally, and it was  
302 essentially the same in the wild type and in the Asc-deficient strain (about 0.1, Fig. 7B). The  
303 F<sub>V</sub>/F<sub>M</sub> value was also unaffected in the *Crvtc2-1* mutant relative to its wild type before or  
304 after the illumination with strong red light (Fig. 7C). The 684nm/710nm ratio of the 77 K  
305 spectra remained constant in the Asc-deficient mutant (Fig. 7D). The violaxanthin,  
306 antheraxanthin, zeaxanthin and lutein contents did not decrease upon illumination with  
307 intense red light in either strain (Supplemental Fig. S7), only the total amount of β-carotene  
308 was slightly lower in the Asc-deficient mutant (Supplemental Fig. S7D). We also observed  
309 that under high light growth conditions, the amount of photosynthetic complexes (namely  
310 PsbA, CP43, PSBO, PsaA, LHCSR3, PetB and RbcL) were essentially the same in the

311 *Crvtc2-1* mutant and in the wild type, as detected by western blot analysis on equal chl basis  
312 (Supplemental Fig. S3).

313 Treatments with 1.5 mM H<sub>2</sub>O<sub>2</sub> led to alteration of the NPQ kinetics and a slower  
314 relaxation in both strains (Fig. 8A, B). In the *Crvtc2-1* mutant, catalase treatment resulted in a  
315 strong decrease of qE and the slow NPQ component (Fig. 8C, D). These results show that  
316 under photoautotrophic and high light conditions, Asc-deficiency does not limit qE or qZ but  
317 may lead to the occurrence of oxidative stress and thereby to increased qI.

318 Subjecting the cells in HSM medium in moderate light (100  $\mu$ mole photons m<sup>-2</sup>s<sup>-1</sup>)  
319 resulted in similar effects in terms of qE, de-epoxidation, the 684/710 nm ratio of the 77 K  
320 spectra and H<sub>2</sub>O<sub>2</sub> and catalase responsiveness (Supplemental Fig. S8).

321

## 322 **Discussion**

323

324 *The Crvtc2-1 CLiP mutant possesses a low Asc content without major changes in the*  
325 *phenotype*

326 *VTC2* encodes GDP-L-galactose phosphorylase, an essential and highly regulated enzyme of  
327 Asc biosynthesis both in vascular plants and in green algae (Urzica et al., 2012; Vidal-  
328 Meireles et al., 2017) and downregulating *VTC2* via the amiRNA technique results in Asc  
329 deficiency (Vidal-Meireles et al., 2017). For the present study, we identified and genetically  
330 complemented a *VTC2* mutant in the CLiP collection that carries a single insertion in the  
331 *VTC2* gene (Fig. 1 and Fig. 2). The *Crvtc2-1* mutant possesses about 10% Asc relative to its  
332 wild type strain CC-4533 under normal growth conditions, its Asc content is unaltered upon  
333 H<sub>2</sub>O<sub>2</sub> treatment and remains below 20% of the wild type under high light conditions; in  
334 addition, by employing overnight dark acclimation, the Asc concentration of the *Crvtc2-1*  
335 mutant strongly decreased (Fig. 4).

336 The *Crvtc2-1* mutant is very likely to be a knockout for *VTC2* as no transcript  
337 accumulation could be detected performing qRT-PCR with primers annealing downstream of  
338 the CIB cassette insertion site and spanning the sequence encoding the catalytic site of GDP-  
339 L-galactose phosphorylase. Only when the cultures were treated with H<sub>2</sub>O<sub>2</sub> and when a high  
340 PCR cycle number was used (Fig. 1E) a faint band could be observed in the gel. It is very  
341 unlikely that a functional truncated GDP-L-galactose phosphorylase is present in the mutant,  
342 but the observation that the *Crvtc2-1* strain still contains 10-20% Asc relative to its parent  
343 strain suggests that some phosphorolysis of GDP-L-galactose could be carried out by another  
344 enzyme ensuring minor amount of Asc. We note that in *Arabidopsis* *VTC2* has a lowly  
345 expressed homologue, *VTC5*, and knocking out both of them results in seedling lethality  
346 (Dowdle et al., 2007). In *Chlamydomonas*, no homologue of *VTC2* has been identified  
347 (Urzica et al., 2012). On the other hand, it is possible that GDP-L-galactose is degraded  
348 hydrolytically (with L-galactose-1-P and GMP as products) leading to minor Asc production  
349 in the *VTC2* mutant. An alternative Asc biosynthesis pathway may also exist in  
350 *Chlamydomonas*, although homologues of enzymes possibly involved in alternative Asc  
351 biosynthesis pathways in vascular plants could not be found in *Chlamydomonas* (Urzica et  
352 al., 2012; Wheeler et al., 2015).

353 In spite of the very low Asc content of the *Crvtc2-1* mutant, the phenotype was only  
354 moderately altered. The *Crvtc2-1* mutant has the same growth rate than the wild type and the  
355 complementation lines at moderate light conditions in TAP medium (Supplemental Fig. S2).  
356 The amounts of various photosynthetic subunits were similar in the Asc-deficient *Crvtc2-1*  
357 mutant than in the wild type strain CC-4533 in TAP medium at moderate light and also in  
358 HSM medium both at moderate and high light (Supplemental Figure S3). Unexpectedly, the  
359 amount of the photoprotective LHCSR3 protein was reduced in the *Crvtc2-1* mutant in TAP  
360 medium at moderate light and it was at the same level than in the wild type when grown in

361 HSM medium both at medium and high light. The amounts of carotenoids are unchanged in  
362 the *Crvtc2-1* line in cultures grown at normal light, whereas at high light in HSM medium,  
363 the amount of  $\beta$ -carotene is slightly reduced (Supplemental Fig. S5 and S7). The *Crvtc2-1*  
364 line had a slightly higher Chl content than its wild type and cell size was also moderately  
365 increased (Fig. 2). A marked characteristics of the *Crvtc2-1* mutants was that it was unable to  
366 grow at high light in TAP medium (Supplemental Fig. S2).

367 In our previously published *VTC2*-amiRNA line *Asc* deficiency led to more severe  
368 alterations in the phenotype than it was observed in the *Crvtc2-1* mutant (Vidal-Meireles et  
369 al., 2017). The reason behind this remains to be elucidated, although the cell wall deficiency  
370 of the cw15-325 line (the parent strain of the *VTC2*-amiRNA line) and thereby its increased  
371 stress sensitivity (Voigt and Münzner, 1994) may explain the differences between the *VTC2*-  
372 amiRNA and the *Crvtc2-1* insertional mutant strains.

373

#### 374 *The effects of Asc deficiency on the qE component of NPQ*

375 *C. reinhardtii* uses various photoacclimation strategies which strongly depend on the carbon  
376 availability and the trophic status of the cells (Polukhina et al., 2016). The fast rise in NPQ  
377 (qE) is enhanced upon growth at high light and low CO<sub>2</sub> that is enabled by a high expression  
378 of LHCSR3 (e.g. Peers et al., 2009). It has been observed that under photomixotrophic  
379 conditions at normal light, the expression of the LHCSR proteins is very low and qE is  
380 minor; in addition, the deepoxidation state is also known to vary with the growth light  
381 (Polukhina et al., 2016). Therefore, in order to study the role of *Asc* in the different NPQ  
382 parameters, we subjected the cultures both to moderate and high light, photomixotrophic and  
383 photoautotrophic conditions. As shown by our results and the discussion below, by these  
384 means we managed to distinguish between qE, qZ, and qI, and only qT could not be studied  
385 in detail.



386 Rapid response to changes in light intensity and dissipation of excess light energy are  
387 particularly important when the activity of the Calvin-Benson-Bassham cycle is limiting, in  
388 order to avoid a potentially deleterious buildup of excessive  $\Delta\text{pH}$  (Kanazawa and Kramer,  
389 2002; Takizawa et al., 2008). In agreement with the literature (Xue et al., 2015), at normal  
390 light and photomixotrophic conditions, the rapidly inducible qE was a minor component and  
391 the relative amount of the LHCSR3 protein, essential for qE development was low  
392 (Supplemental Fig. S3). When *Chlamydomonas* cultures were grown at photoautotrophic,  
393 possibly CO<sub>2</sub>-limiting conditions, the amplitude of qE largely increased both at moderate and  
394 high light (Supplemental Fig S8 and Fig. 8, respectively) enabled by the accumulation of  
395 LHCSR3 (Supplemental Fig. S3) and possibly by other factors.

396 Our results on the *Crvtc2-1* line show that qE is not limited by Asc deficiency neither  
397 at low light nor at high light conditions, nor under photomixotrophic and photoautotrophic  
398 conditions; in the *VTC2*-amiRNA line, qE was even enhanced relative to its control line  
399 (Supplemental Fig. S4B).

400

#### 401 *The effects of Asc deficiency on the slow NPQ components*

402 In *Chlamydomonas*, a slowly induced NPQ component, with several underlying mechanisms,  
403 may also be induced. When CC-4533 cultures were grown at normal light in TAP medium  
404 and subjected to strong red light, the major slow component was probably qZ, as shown by  
405 the large increase in de-epoxidation (Fig. 3) and by the loss of NPQ induction in the *npq1*  
406 mutant (Fig. 6). In cultures grown at high light and photoautotrophic conditions, de-  
407 epoxidation was minor upon light adaptation with strong red light (Fig. 7) and it was  
408 intermediate when the cultures were grown photoautotrophically at moderate light  
409 (Supplemental Fig. S8). De-epoxidation was equal in the *Crvtc2-1* mutant and the wild type  
410 in all growth conditions and also upon overnight dark acclimation that led to undetectably

411 low Asc content in the *Crvtc2-1* mutant. These results clearly show that Asc deficiency is not  
412 limiting qZ, thus Asc is not used as a reductant by CrCVDE.

413 The xanthophyll cycle, in which violaxanthin is converted into zeaxanthin during light  
414 acclimation, is ubiquitous among green algae, mosses and plants, with exception of  
415 Bryopsidales, a monophyletic branch of the Ulvophyceae in which NPQ is neither related to  
416 a pH-dependent mechanism, nor modulated by the activity of the xanthophyll cycle (Christa  
417 et al., 2017). It has also been shown that among green alga species, large variations exist in  
418 the activity of xanthophyll cycle and in its overall contribution to NPQ, which seems to  
419 depend on the environmental selection pressure and less on the phylogeny (Quaas et al.,  
420 2015). In mosses, the xanthophyll cycle was shown to significantly contribute to excess  
421 energy dissipation upon stress conditions (e.g. Azzabi et al., 2012).

422 The de-epoxidation reaction itself is catalyzed by distinct enzymes in vascular plants  
423 and in Chlorophyceae, including *Chlamydomonas* (Li et al., 2016a). Plant-type VDE is  
424 associated with the thylakoid membrane on the luminal side, where it catalyzes the de-  
425 epoxidation reaction of violaxanthin, found in free lipid phase and it uses Asc as a reductant  
426 (Hager and Holocher, 1994; Arnoux et al., 2009). CVDE is located on the stromal side of the  
427 thylakoid membrane, and, just like higher plant VDE, it also requires a build-up of  $\Delta$ pH for  
428 its activity (Li et al., 2016a). CVDE is related to lycopene cyclases of photosynthetic bacteria,  
429 called CruA and CruP (Li et al., 2016a, Bradbury et al., 2012). We have demonstrated in this  
430 paper that Asc is not required for the de-epoxidation reaction, and, in general, for qZ in  
431 *Chlamydomonas*.

432 Green algae contain very small amounts of Asc relative to vascular plants, and, as  
433 stated above, effective de-epoxidation is achieved by an enzyme that does not require Asc as  
434 a reductant. Interestingly, brown algae, which produce minor amounts of Asc as well,  
435 diadinoxanthin de-epoxidase uses Asc as a reductant with much higher affinity for Asc than

436 plant-type VDE, in combination with a shift of its pH optimum towards lower values  
437 enabling efficient de-epoxidation (Grouneva et al., 2006). Mosses have plant-type VDE  
438 enzymes (Pinnola et al., 2013), which probably require Asc as a reductant. Since mosses  
439 contain approx. ten times less Asc compared to vascular plants (Gest et al., 2013), it remains  
440 to be explored how this low amount of Asc allows a rapid and intensive development of  
441 NPQ, characteristic of mosses (e.g. Marschall and Proctor, 2004).

442 In *Chlamydomonas*, light and O<sub>2</sub> availability-dependent state transition (qT),  
443 involving major reorganizations of LHCs, also modulate NPQ (Depège, 2003; Lemeille et al.,  
444 2009; Ünlü et al., 2014). Under our experimental conditions, ensuring aeration during both  
445 the dark and the light adaptation, and using strong red light as actinic light, no decrease  
446 occurred in the 685/710 nm ratio of the 77 K fluorescence spectra, suggesting that state I to  
447 state II transition did not affect the NPQ induction in the wild type nor in the Asc-deficient  
448 strains. The *stt7-9* mutant, unable to perform state transition, did not show decreased NPQ  
449 (Supplemental Fig. S6), which would be expected if state transition would constitute a major  
450 form of NPQ under our experimental conditions. However, our data do not exclude the  
451 possibility that Asc may participate in state transition under conditions favoring its  
452 occurrence.

453 A fourth, and rather complex component of NPQ is qI, possibly with several  
454 underlying mechanisms involved (Adams et al., 2013; Tikkanen et al., 2014). We observed  
455 both under photomixotrophic conditions at moderate light and under photoautotrophic  
456 conditions that the slow NPQ component was enhanced in the *Crvtc2-1* mutant upon  
457 illumination with strong red light, which, however, was not attributable to qZ or to qT.  
458 Ascorbate deficiency is accompanied by an increase in the intracellular H<sub>2</sub>O<sub>2</sub> content in  
459 *Chlamydomonas* (Vidal-Meireles et al., 2017) and ROS are known to enhance NPQ via  
460 several mechanisms (Roach and Na, 2017). Using H<sub>2</sub>O<sub>2</sub> and catalase treatments (Fig. 5 and 8,

461 Supplemental Fig. S8), we clearly show that ROS formation is involved in the slowly induced  
462 NPQ component in the *Asc*-deficient strain that can be interpreted as qI. In the wild type, the  
463 contribution of qI to NPQ was probably minor under our experimental conditions, since  
464 catalase treatment did not diminish NPQ formation (Fig. 5D).

465 In conclusion, our results reveal fundamental differences between vascular plants and  
466 *Chlamydomonas* regarding the role of *Asc* in NPQ. Whereas in vascular plants, the most  
467 prominent role of *Asc* is to be a reductant of VDE, in *Chlamydomonas*, it is pertinent in  
468 preventing ROS formation that would lead to photoinhibitory quenching mechanisms.

469

## 470 **Materials and Methods**

471

### 472 *Algal strains and growth conditions*

473 *Chlamydomonas reinhardtii* strains CC-4533 (designated as wild type) and  
474 *LMJ.RY0402.058624* (designated as *Crvtc2-1*) were obtained from the CLiP library (Li et al.,  
475 2016b). The 137a (CC-125) strain and the *npq1* (CC-4100) mutant were obtained from the  
476 *Chlamydomonas* Resource Center (<https://www.chlamycollection.org/>). The *ARG7*  
477 complemented strain *cw15-412* (provided by Dr Michael Schroda (Technische Universität  
478 Kaiserslautern, Germany)) was used as control for the *stt7-9* mutant (Depège et al., 2003).  
479 The *VTC2*-amiRNA strain and its control *EV2* strain are described in Vidal-Meireles et al.  
480 (2017).

481 The synthetic coding sequence of *VTC2* including a 38 bp-long upstream sequence  
482 homologous to the *PSAD* 5'UTR with the BsmI restriction enzyme recognition site was  
483 ordered from Genecust ([www.genecust.com](http://www.genecust.com)). The *VTC2* insert was ligated as BsmI/EcoRI  
484 fragment into the similarly digested pJR39 (Neupert et al., 2009) vector, resulting in vector  
485 pJR112. Finally, pJR112 was digested with BsmI and SmaI and the *VTC2*-containing

486 BsmI/SmaI fragment was ligated to the similarly digested pJR91 vector that carries the  
487 *APH7''* resistance marker for selection on hygromycin-B. Transformation of the *Crvt2-1*  
488 mutant strain was done via electroporation in a Bio-Rad GenePulser Xcell™ instrument, at  
489 1000 V, with 10 F capacitance and infinite resistance using a 4-mm gap cuvette. The cells  
490 were plated onto selective agar plates (TAP + 10 µg/ml hygromycin-B) and colonies were  
491 picked after 10 days of growth under moderate light (80 µmole photons m<sup>-2</sup> s<sup>-1</sup>).

492 *Chlamydomonas* pre-cultures were grown in 50-ml Erlenmeyer flasks in Tris-acetate  
493 phosphate (TAP) medium for three days at 22°C and 100 µmole photons m<sup>-2</sup> s<sup>-1</sup> on a rotatory  
494 shaker. Following this phase, cultures were grown in 100-ml Erlenmeyer flasks  
495 photomixotrophically (in TAP medium) or photoautotrophically (in high salt minimal (HSM)  
496 medium) at 22°C at 100 or 530 µmole photons m<sup>-2</sup> s<sup>-1</sup> for two additional days. The initial cell  
497 density was set to 1 million cells/ml.

498

#### 499 *DNA Isolation and PCR*

500 Total genomic DNA from *C. reinhardtii* strains CC-4533 and *Crvt2-1* (LMJ.RY0402.058624)  
501 was extracted according to published protocols (Barahimipour et al., 2015; Schroda et al.,  
502 2001), and 1 µl of the extracted DNA were used as template for the PCR assays, using the  
503 GoTaq DNA polymerase (Promega GmbH).

504 To confirm the CIB1 insertion site in the *Crvt2-1* strain, PCR assays were conducted  
505 using gene specific primers that anneal upstream and downstream of the predicted insertion  
506 site of the cassette as well as primers specific for the 5' and 3' end of the CIB cassette.  
507 Primers 1 (5'-TGATGGCCAAGGGCTTAGTG-3') and 2 (5'-  
508 CCGCAAACACCATGCAATCT-3') amplified the region of the gene upstream the predicted  
509 site of CIB1 cassette insertion (control amplicon with an expected size of 852 bp), primers 3  
510 (5'-AGATTGCATGGTGTGTTTGCGG-3') and 4 (5'-CAGGCCATGTGAGAGTTTGCC-3')

511 amplified the 3' junction site of the CIB1 cassette (amplicon with an expected size of 470  
512 bp), and primers 5 (5'-GCACCAATCATGTCAAGCCT-3') and 6 (5'-  
513 TGTTGTAGCCCACGCGGAAG-3') amplified the 5' junction site of the cassette (amplicon  
514 with an expected size of 601 bp). The primers 11 (5'-  
515 GCTCTTGACTCGTTGTGCATTCTAG-3') and 12 (5'-CACTGAGACACGTCGTACCTG -  
516 3') amplified the 3' junction site of the *PsaD* promoter with the *VTC2* gene in the plasmid  
517 used for complementation (amplicon with an expected size of 841 bp).

518

#### 519 *Analyses of gene expression by qRT-PCR*

520 Sample collection and RNA isolation was performed as in Vidal-Meireles et al., (2017). The  
521 primer pairs for the *VTC2* gene and the reference genes (*bTub2* - Cre12.g549550, *actin* -  
522 Cre13.g603700, *UBQ* - XP\_001694320) used in real time qRT-PCR were published earlier in  
523 Vidal-Meireles et al. (2017). The annealing sites of the primers for analyzing *VTC2*  
524 expression are indicated as primers 7 and 8 in Fig. 1. Primers 9 (5'-  
525 AACCACCTGCACTTCCACGCTTAC-3') and 10 (5'-TGCCCCGCAATCTCAAACGATG-  
526 3') spanned the sequence encoding the catalytic site of *VTC2* (amplicon with an expected size  
527 of 434 bp).

528 The real time qRT-PCR data are presented as fold-change in mRNA transcript  
529 abundance of the *VTC2* gene, normalized to the average of the three reference genes, and  
530 relative to the untreated CC-4533 strain. Real-time qRT-PCR analysis was carried out with  
531 three technical replicates for each sample and three biological replicates were measured; the  
532 standard error was calculated based on the range of fold-change by calculating the minimum  
533 and the maximum of the fold-change using the standard deviations of  $\Delta\Delta Ct$ .

534

#### 535 *Determination of cell size, cell density, chlorophyll, Asc and carotenoid contents*

536 The cell density was determined by a Scepter™ 2.0 hand-held cell counter (Millipore), as  
537 described in Vidal-Meireles et al., (2017).

538 The Chl content was determined according to Porra (1989) and the Asc content was  
539 determined as in Kovács et al., (2016).

540 For carotenoid content determination, liquid culture containing 30 µg Chl(a+b)/ml  
541 was filtered onto a Whatman glass microfibre filter (GF/C) and frozen in liquid N<sub>2</sub> at  
542 different time points in the NPQ induction protocol. The pigments were extracted by re-  
543 suspending the cells in 500 µl of ice-cold acetone. After re-suspension, the samples were  
544 incubated in the dark for 30 min. This was followed by centrifugation at 11500 g, 4°C, for 10  
545 min and the supernatant was collected and passed through a PTFE 0.2 µm pore size syringe  
546 filter.

547 Quantification of carotenoids was performed by HPLC using a Shimadzu Prominence  
548 HPLC system (Shimadzu, Kyoto, Japan) consisting of two LC-20AD pumps, a DGU-20A  
549 degasser, a SIL-20AC automatic sample injector, CTO-20AC column thermostat and a  
550 Nexera X2 SPD-M30A photodiode-array detector. Chromatographic separations were carried  
551 out on a Phenomenex Synergi Hydro-RP 250 x 4.6 mm column with a particle size of 4 µm  
552 and a pore size of 80 Å. 20 µl aliquots of acetonic extract was injected to the column and the  
553 pigments were eluted by a linear gradient from solvent A (acetonitrile, water, triethylamine,  
554 in a ratio of 9:1:0.01) to solvent B (ethylacetate). The gradient from solvent A to solvent B  
555 was run from 0 to 25 min at a flow rate of 1 ml/min. The column temperature was set to 25  
556 °C. Eluates were monitored in a wavelength range of 260 nm to 750 nm at a sampling  
557 frequency of 1.5625 Hz. Pigments were identified according to their retention time and  
558 absorption spectrum and quantified by integrated chromatographic peak area recorded at the  
559 wavelength of maximum absorbance for each kind of pigments using the corresponding  
560 molar decadic absorption coefficient (Jeffrey et al., 1997). The de-epoxidation index of the

561 xanthophyll cycle components was calculated as (zeaxanthin + antheraxanthin)/(violaxanthin  
562 + antheraxanthin + zeaxanthin).

563

#### 564 *Chemical treatments*

565 For Asc supplementation, 1 mM Na-Asc (Roth GmbH) was added to the cultures, and  
566 measurements were carried out after a 2 h incubation period in the light.

567 For H<sub>2</sub>O<sub>2</sub> treatments, the cell density was adjusted to 3 million cells/ml and 1.5 mM  
568 H<sub>2</sub>O<sub>2</sub> (Sigma Aldrich) was added. The presented measurements were carried out 7 h  
569 following the addition of H<sub>2</sub>O<sub>2</sub>.

570 Catalase (5 µg/ml, from bovine liver, Sigma Aldrich) was added after a 30-min dark  
571 adaptation and the measurements were carried out after an additional 2 h incubation period in  
572 the dark with shaking.

573

#### 574 *Western blot analysis*

575 Protein isolation and western blot analysis were performed as in Vidal-Meireles et al., (2017).  
576 Specific polyclonal antibodies (produced in rabbits) against PsaA, PsbA, RbcL, LHCSR3,  
577 CP43, and PetB were purchased from Agrisera AB. Specific polyclonal antibody (produced  
578 in rabbits) against PSBO was purchased from AntiProt.

579

#### 580 *NPQ measurements*

581 Chlorophyll *a* fluorescence was measured using a Dual-PAM-100 instrument (Heinz Walz  
582 GmbH, Germany). *C. reinhardtii* cultures were dark-adapted for 30 min and then liquid  
583 culture containing 30 µg Chl(a+b)/ml was filtered onto Whatman glass microfibre filters  
584 (GF/B) that was placed in between two microscopy cover slips with a spacer to allow for gas  
585 exchange. For NPQ induction, light adaptation consisted of 30 min illumination at 530 µmole



586 photons  $\text{m}^{-2} \text{s}^{-1}$ , followed by 12 min of dark adaptation interrupted with saturating pulses of  
587 3000  $\mu\text{mole photons m}^{-2} \text{s}^{-1}$ .

588

#### 589 *Low-temperature fluorescence emission spectra (77K) measurements*

590 Algal cultures containing 2  $\mu\text{g Chl(a+b)/ml}$  were collected at several time points during the  
591 NPQ induction protocol. Subsequently, the sample was filtered onto a Whatman glass  
592 microfibre filter (GF/C), placed in a sample holder and immediately frozen in liquid  $\text{N}_2$ . Low-  
593 temperature (77K) fluorescence emission spectra were measured using a spectrofluorometer  
594 (Fluorolog- 3/Jobin–Yvon–Spex Instrument S.A., Inc.) equipped with a home-made liquid  
595 nitrogen cryostat. The fluorescence emission spectra between 650 and 750 nm were recorded  
596 with an interval of 0.5 nm, using an excitation wavelength of 436 nm and excitation and  
597 emission slits of 5 and 2 nm, respectively. The final spectra were corrected for the  
598 photomultiplier's spectral sensitivity.

599

#### 600 *Statistics*

601 The presented data are based on at least three independent experiments. When applicable,  
602 averages and standard errors ( $\pm\text{SE}$ ) were calculated. Statistical significance was determined  
603 using one-way ANOVA followed by Dunnett multiple comparison post-tests (GraphPad  
604 Prism 7.04; GraphPad Software, USA). Changes were considered statistically significant at  $p$   
605  $< 0.05$ .

606

#### 607 **Acknowledgements:**

608 The authors thank Prof. Dr. Ralph Bock (MPI-MP Potsdam, Germany) and Dr. Petar  
609 Lambrev (BRC Szeged, Hungary) for discussions, Dr. Anikó Galambos (BRC Szeged,

610 Hungary) for the assistance with ordering the mutants from the CLiP library, and for Dr.  
611 László Szabados (BRC Szeged, Hungary) for the possibility to use their CCD camera.  
612  
613 No conflicts of interest declared.

614 **References**

- 615 Adams WW III, Muller O, Cohu CM, Demmig-Adams B (2013) May photoinhibition be a  
616 consequence, rather than a cause, of limited plant productivity? *Photosynth Res* 117:31-  
617 44
- 618 Allorent G, Tokutsu R, Roach T, Peers G, Cardol P, Girard-Bascou J, Seigneurin-Berny D,  
619 Petroustos D, Kuntz M, Breyton C, Franck F, Wollman FA, Niyogi KK, Krieger-  
620 Liskay A, Minagawa J, Finazzi G (2013) A dual strategy to cope with high light in  
621 *Chlamydomonas reinhardtii*. *Plant Cell* 25:545-557
- 622 Anwaruzzaman M, Chin BL, Li X-P, Lohr M, Martinez DA, Niyogi KK (2004) Genomic  
623 analysis of mutants affecting xanthophyll biosynthesis and regulation of photosynthetic  
624 light harvesting in *Chlamydomonas reinhardtii*. *Photosynth Res* 82:265-276
- 625 Arnoux P, Morosinotto T, Saga G, Bassi R, Pignol D (2009) A structural basis for the pH-  
626 dependent xanthophyll cycle in *Arabidopsis thaliana*. *Plant Cell* 21: 2036-2044
- 627 Asada K (2006) Production and scavenging of reactive oxygen species in chloroplasts and  
628 their functions. *Plant Physiol* 141: 391-396
- 629 Avenson TJ, Ahn TK, Zigmantas D, Niyogi KK, Li Z, Ballottari M, Bassi R, Fleming GR  
630 (2008) Zeaxanthin radical cation formation in minor light-harvesting complexes of  
631 higher plant antenna. *J Biol Chem* 283:3550-3558
- 632 Azzabi G, Pinnola A, Betterle N, Bassi R, Alboresi A (2012) Enhancement of non-photo de-  
633 epoxidation index chemical quenching in the bryophyte *Physcomitrella patens* during  
634 acclimation to salt and osmotic stress. *Plant Cell Physiol* 53: 1815-1825
- 635 Barahimipour R, Strenkert D, Neupert J, Schroda M, Merchant SS, Bock R (2015) Dissecting  
636 the contributions of GC content and codon usage to gene expression in the model alga  
637 *Chlamydomonas reinhardtii*. *Plant J* 84: 704-717

- 638 Baroli I, Do AD, Yamane T, Niyogi KK (2003) Zeaxanthin accumulation in the absence of a  
639 functional xanthophyll cycle protects *Chlamydomonas reinhardtii* from photooxidative  
640 stress. *Plant Cell* 15: 992-1008
- 641 Bratt C, Arvidsson P, Carlsson M, Akerlund H (1995) Regulation of violaxanthin de-  
642 epoxidase activity by pH and ascorbate. *Photosynth Res* 45: 169-175
- 643 Bonente G, Ballottari M, Truong T, Morosinotto T, Ahn T, Fleming G, Niyogi K, Bassi R  
644 (2011) Analysis of LhcSR3, a protein essential for feedback de- excitation in the green  
645 alga *Chlamydomonas reinhardtii*. *PLoS Biol* 9:e1000577
- 646 Bradbury LMT, Shumskaya M, Tzfadia O, Wu S-B, Kennelly EK, Wurtzelt ET (2012)  
647 Lycopene cyclase paralog CruP protects against reactive oxygen species in oxygenic  
648 photosynthetic organisms. *Proc Natl Acad Sci USA* 109:E1888-E1897
- 649 Chaux F, Johnson X, Auroy P, Beyly-Adriano A, Te I, Cuiné S, Peltier G (2017) PGRL1 and  
650 LHCSR3 compensate for each other in controlling photosynthesis and avoiding  
651 photosystem I photoinhibition during high light acclimation of *Chlamydomonas* cells.  
652 *Mol Plant* 10:216-218
- 653 Christa G, Cruz S, Jahns P, de Vries J, Cartaxana P, Esteves AC, Serôdio J, Gould SB (2017)  
654 Photoprotection in a monophyletic branch of chlorophyte algae is independent of  
655 energy-dependent quenching (qE). *New Phytol* 214: 1132-1144
- 656 Depège N, Bellafiore S, Rochaix JD (2003) Role of chloroplast protein kinase Stt7 in LHCII  
657 phosphorylation and state transition in *Chlamydomonas*. *Science* 299: 1572-1575
- 658 Dowdle J, Ishikawa T, Gatzek S, Rolinski S, Smirnov N (2007) Two genes in *Arabidopsis*  
659 *thaliana* encoding GDP-L-galactose phosphorylase are required for ascorbate  
660 biosynthesis and seedling viability. *Plant J* 52: 673-689
- 661 Erickson E, Wakao S, Niyogi KK (2015) Light stress and photoprotection in *Chlamydomonas*  
662 *reinhardtii*. *Plant J* 82:449-465

- 663 Fernie AR, Tóth SZ (2015) Identification of the elusive chloroplast ascorbate transporter  
664 extends the substrate specificity of the PHT family. *Mol Plant* 8:674-676
- 665 Finazzi G, Johnson GN, Dall'Osto L, Zito F, Bonente G, Bassi R, Wollman F-A (2006)  
666 Nonphotochemical quenching of chlorophyll fluorescence in *Chlamydomonas*  
667 *reinhardtii*. *Biochemistry* 45:1490-1498
- 668 Foyer CH, Shigeoka S (2011) Understanding oxidative stress and antioxidant functions to  
669 enhance photosynthesis. *Plant Physiol* 155: 93-100
- 670 Gest N, Gautier H, Stevens R (2013) Ascorbate as seen through plant evolution: the rise of a  
671 successful molecule? *J Exp Bot* 64:33-53
- 672 Grouneva I, Jakob T, Wilhelm C, Goss R (2006) Influence of ascorbate and pH on the  
673 activity of the diatom xanthophyll cycle-enzyme diadinoxanthin de-epoxidase. *Physiol*  
674 *Plant* 126:205-211
- 675 Hager A, Holocher K (1994) Localization of the xanthophyll-cycle enzyme violaxanthin de-  
676 epoxidase within the thylakoid lumen and abolition of its mobility by a (light-  
677 dependent) pH decrease. *Planta* 192: 581-589
- 678 Hallin EI, Hasan M, Guo K, Åkerlund H-E (2016) Molecular studies on structural changes  
679 and oligomerisation of violaxanthin de-epoxidase associated with the pH-dependent  
680 activation. *Photosynth Res* 129: 29-41
- 681 Hieber AD, Bugos RC, Yamamoto HY (2000) Plant lipocalins: violaxanthin de-epoxidase  
682 and zeaxanthin epoxidase. *Biochim Biophys Acta BBA - Protein Struct Mol Enzymol*  
683 1482: 84-91
- 684 Holt NE, Zigmantas D, Valkunas L, Li X-P, Niyogi KK, Fleming GR (2005) Carotenoid  
685 cation formation and the regulation of photosynthetic light harvesting. *Science*  
686 307:433-436

- 687 Holub O, Seufferheld MJ, Gohlke C, Heiss GJ, Clegg RM (2007) Fluorescence lifetime  
688 imaging microscopy of *Chlamydomonas reinhardtii*: non-photochemical quenching  
689 mutants and the effect of photosynthetic inhibitors on the slow chlorophyll fluorescence  
690 transient. *J Microsc* 226: 90-120
- 691 Ivanov B, Asada K, Edwards GE (2007) Analysis of donors of electrons to photosystem I and  
692 cyclic electron flow by redox kinetics of P700 in chloroplasts of isolated bundle sheath  
693 strands of maize. *Photosynth Res* 92:65-74
- 694 Iwai M, Kato N, Minagawa J (2007) Distinct physiological responses to a high light and low  
695 CO<sub>2</sub> environment revealed by fluorescence quenching in photoautotrophically grown  
696 *Chlamydomonas reinhardtii*. *Photosynth Res* 94:307-314
- 697 Jeffrey SW, Mantoura RFC, Wright SW (1997) Phytoplankton pigments in oceanography:  
698 guidelines to modern methods. (Paris: UNESCO Publishing)
- 699 Johnson X, Alric J (2012) Interaction between starch breakdown, acetate assimilation, and  
700 photosynthetic cyclic electron flow in *Chlamydomonas reinhardtii*. *J Biol Chem*  
701 287:26445-26452
- 702 Johnson MP, Davison PA, Ruban AV, Horton P (2008) The xanthophyll cycle pool size  
703 controls the kinetics of non-photochemical quenching in *Arabidopsis thaliana*. *FEBS*  
704 *Lett* 582:259-263
- 705 Kanazawa A, Kramer DM (2002). In vivo modulation of nonphotochemical exciton  
706 quenching (NPQ) by regulation of the chloroplast ATP synthase. *Proc Natl Acad Sci*  
707 *USA* 99:12789-12794
- 708 Kovács L, Vidal-Meireles A, Nagy V, Tóth SZ (2016) Quantitative determination of  
709 ascorbate from the green alga *Chlamydomonas reinhardtii* by HPLC. *Bio-Protoc*  
710 6:e2067

- 711 Lemeille S, Willig A, Depège-Fargeix N, Delessert C, Bassi R, Rochaix J-D (2009) Analysis  
712 of the chloroplast protein kinase Stt7 during state transitions. PLoS Biol 7: e1000045
- 713 Li S, Liu L, Zhuang X, Yu Y, Liu X, Cui X, Ji L, Pan Z, Cao X, Mo B, Zhang F, Raikhel N,  
714 Jiang L, and Chen X (2013) MicroRNAs inhibit the Translation of target mRNAs on  
715 the endoplasmic reticulum in Arabidopsis. Cell 153: 562-574
- 716 Li Z, Peers G, Dent RM, Bai Y, Yang SY, Apel W, Leonelli L, Niyogi KK (2016a) Evolution  
717 of an atypical de-epoxidase for photoprotection in the green lineage. Nat Plants 2:  
718 16140
- 719 Li X, Zhang R, Patena W, Gang SS, Blum SR, Ivanova N, Yue R, Robertson JM, Lefebvre  
720 PA, Fitz-Gibbon ST, Grossman AR, Jonikas MC (2016b) An indexed, mapped mutant  
721 library enables reverse genetics studies of biological processes in *Chlamydomonas*  
722 *reinhardtii*. Plant Cell 28: 367-387
- 723 Marschall M, Proctor MCF (2004) Are bryophytes shade plants? Photosynthetic light  
724 responses and proportions of chlorophyll *a*, chlorophyll *b* and total carotenoids. Ann  
725 Bot 94: 593-603
- 726 Müller-Moulé P, Conklin PL, Niyogi KK (2002) Ascorbate deficiency can limit violaxanthin  
727 de-epoxidase activity in vivo. Plant Physiol 128: 970-977
- 728 Müller-Moulé P, Havaux M, Niyogi KK (2003) Zeaxanthin deficiency enhances the high  
729 light sensitivity of an ascorbate-deficient mutant of Arabidopsis. Plant Physiol 133:  
730 748-760.
- 731 Nagy V, Vidal-Meireles A, Podmaniczki A, Szentmihályi K, Rákhely G, Zsigmond L,  
732 Kovács L, Tóth SZ (2018) The mechanism of photosystem II inactivation during  
733 sulphur deprivation-induced H<sub>2</sub> production in *Chlamydomonas reinhardtii*. Plant J  
734 94:548-561

- 735 Neupert J, Karcher D, Bock R (2009) Generation of *Chlamydomonas* strains that efficiently  
736 express nuclear transgenes. *Plant J* 57:1140-1150
- 737 Niyogi KK, Bjorkman O, Grossmann AR (1997) *Chlamydomonas* xanthophyll cycle mutants  
738 identified by video imaging of chlorophyll fluorescence quenching. *Plant Cell* 9:1369-  
739 1380
- 740 Peers G, Truong TB, Ostendorf E, Busch A, Elrad D, Grossman AR, Hippler M, Niyogi KK  
741 (2009) An ancient light-harvesting protein is critical for the regulation of algal  
742 photosynthesis. *Nature* 462:518-521
- 743 Pinnola A, Dall'Osto L, Gerotto C, Morosinotto T, Bassi R, Alboresi A (2013) Zeaxanthin  
744 binds to Light-Harvesting Complex Stress-Related Protein to enhance  
745 nonphotochemical quenching in *Physcomitrella patens*. *Plant Cell* 25:3519-3534
- 746 Polukhina I, Fristedt R, Dinc E, Cardol P, Croce R (2016) Carbon supply and  
747 photoacclimation cross talk in the green alga *Chlamydomonas reinhardtii*. *Plant Physiol*  
748 172: 1494-1505
- 749 Porra RJ, Thompson WA, Kriedeman PE (1989) Determination of accurate extinction  
750 coefficients and simultaneous equations for assaying chlorophylls-a and -b with four  
751 different solvents: verification of the concentration of chlorophyll standards by atomic  
752 absorption spectroscopy. *Biochim Biophys Acta* 975: 384-394
- 753 Quaas T, Berteotti S, Ballottari M, Flieger K, Bassi R, Wilhelm C, Goss R (2015) Non-  
754 photochemical quenching and xanthophyll cycle activities in six green algal species  
755 suggest mechanistic differences in the process of excess energy dissipation. *J. Plant*  
756 *Physiol* 172: 92-103
- 757 Roach T, Na CS (2017) LHCSR3 affects de-coupling and re-coupling of LHCII to PSII  
758 during state transitions in *Chlamydomonas reinhardtii*. *Sci Rep* 7: 43145



- 759 Ruban AV, Johnson MP, Duffy CD (2012) The photoprotective molecular switch in the  
760 photosystem II antenna. *Biochim Biophys Acta* 1817:167-181
- 761 Saga G, Giorgetti A, Fufezan C, Giacometti GM, Bassi R, Morosinotto T (2010) Mutation  
762 analysis of violaxanthin de-epoxidase identifies substrate-binding sites and residues  
763 involved in catalysis. *J Biol Chem* 285:23763-23770
- 764 Schroda M, Vallon O, Whitelegge JP, Beck CF, Wollman FA (2001) The chloroplastic GrpE  
765 homolog of *Chlamydomonas*: two isoforms generated by differential splicing. *Plant*  
766 *Cell* 13:2823-2839
- 767 Smirnoff N (2018) Ascorbic acid metabolism and functions: A comparison of plants and  
768 mammals. *Free Radic Biol Med.* 122:116-129
- 769 Takizawa K, Kanazawa A, Kramer DM (2008) Depletion of stromal Pi induces high ‘energy  
770 dependent’ antenna exciton quenching (qE) by decreasing proton conductivity at CFO-  
771 CF1 ATP synthase. *Plant Cell Environ* 31:235-243
- 772 Tibiletti T, Auroy P, Peltier G, Caffarri S (2016) *Chlamydomonas reinhardtii* PsbS protein is  
773 functional and accumulates rapidly and transiently under high light. *Plant Physiol*  
774 171:2717-2730
- 775 Tikkanen M, Mekala NR, Aro E-M (2014) Photosystem II photoinhibition-repair cycle  
776 protects photosystem I from irreversible damage. *Biochim Biophys Acta - Bioenerg*  
777 1837: 210-215
- 778 Tóth SZ, Puthur JT, Nagy V, Garab G (2009) Experimental evidence for ascorbate-dependent  
779 electron transport in leaves with inactive oxygen-evolving complexes. *Plant Physiol*  
780 149: 1568-1578
- 781 Tóth SZ, Nagy V, Puthur JT, Kovács L, Garab G (2011) The physiological role of ascorbate  
782 as photosystem II electron donor: Protection against photoinactivation in heat-stressed  
783 leaves. *Plant Physiol* 156: 382-392

- 784 Tóth SZ, Lőrincz T, Szarka A (2018) Concentration does matter: The beneficial and  
785 potentially harmful effects of ascorbate in humans and plants. *Antioxid Redox Signal*  
786 29:1516-1533
- 787 Ünlü C, Drop B, Croce R, van Amerongen H (2014) State transitions in *Chlamydomonas*  
788 *reinhardtii* strongly modulate the functional size of photosystem II but not of  
789 photosystem I. *Proc Natl Acad Sci USA* 111:3460-3465
- 790 Urzica EI, Adler LN, Page MD, Linster CL, Arbing MA, Casero D, Pellegrini M, Merchant  
791 SS, Clarke SG (2012) Impact of oxidative stress on ascorbate biosynthesis in  
792 *Chlamydomonas* via regulation of the *VTC2* gene encoding a GDP-L-galactose  
793 phosphorylase. *J Biol Chem* 287: 14234-14245
- 794 Vidal-Meireles A, Neupert J, Zsigmond L, Rosado-Souza L, Kovács L, Nagy V, Galambos  
795 A, Fernie AR, Bock R, Tóth SZ (2017) Regulation of ascorbate biosynthesis in green  
796 algae has evolved to enable rapid stress-induced response via the *VTC2* gene encoding  
797 GDP- L -galactose phosphorylase. *New Phytol* 214: 668-681
- 798 Voigt J, Münzner P (1994) Blue light-induced lethality of a cell wall-deficient mutant of the  
799 unicellular green alga *Chlamydomonas reinhardtii*. *Plant Cell Physiol* 35: 99-106
- 800 Wang Z, Xiao Y, Chen W, Tang K, Zhang L (2010) Increased vitamin C content  
801 accompanied by an enhanced recycling pathway confers oxidative stress tolerance in  
802 *Arabidopsis*. *J. Integr. Plant Biol* 52: 400-409
- 803 Wheeler G, Ishikawa T, Pornsaksit V, Smirnoff N (2015) Evolution of alternative  
804 biosynthetic pathways for vitamin C following plastid acquisition in photosynthetic  
805 eukaryotes. *eLife* 4:e06369
- 806 Xue H, Tokutsu R, Bergner SV, Scholz M, Minagawa J, Hippler M (2015) Photosystem II  
807 subunit R is required for efficient binding of Light-Harvesting Complex Stress-Related

- 808 Protein 3 to photosystem II-light-harvesting supercomplexes in *Chlamydomonas*  
809 *reinhardtii*. Plant Physiol 167: 1566-1578
- 810 Zechmann B, Stumpe M, Mauch F (2011) Immunocytochemical determination of the  
811 subcellular distribution of ascorbate in plants. Planta 233: 1-12

812 **Figure legends**

813

814 **Figure 1.** Characterization of an insertional CLiP mutant of *C. reinhardtii*  
815 (*LMJ.RY0402.058624*, named *Crvtc2-1*), affected in the *VTC2* gene that encodes GDP-L-  
816 galactose phosphorylase. A, Physical map of the *VTC2* gene (obtained from Phytozome  
817 v12.1.6) with the CIB1 cassette insertion site in the *Crvtc2-1* mutant. Exons are shown in  
818 black, introns in light grey, and promoter/ 5' UTR and terminator sequences in dark grey.  
819 Insertion site of the CIB1 cassette is indicated by triangle and the binding sites of the primers  
820 used for genotyping and gene expression analysis of *Crvtc2-1* are shown as black arrows. The  
821 sequence encoding the catalytic site of GDP-L-galactose phosphorylase is marked as a white  
822 line within Exon 3; B, PCR performed using primers annealing upstream the predicted  
823 cassette insertion site in *VTC2* (top panel, using primers P1+P2), and using primers  
824 amplifying the 5' and 3' genome-cassette junctions (using primers P3+P4 and P5+P6,  
825 respectively, middle and bottom panels). The expected sizes are marked with arrows; C,  
826 Ascorbate contents of the wild type (CC-4533) and the *Crvtc2-1* mutant grown  
827 mixotrophically in TAP medium at moderate light with and without the addition of 1.5 mM  
828 H<sub>2</sub>O<sub>2</sub>; D, Transcript levels of *VTC2*, as determined by real-time qRT-PCR in cultures  
829 supplemented or not with H<sub>2</sub>O<sub>2</sub>, using primers P7+P8. E, qRT-PCR analysis using primers  
830 P9+P10, spanning the sequence that encodes the catalytic site of GDP-L-galactose  
831 phosphorylase. The number of PCR cycles is indicated at the bottom of the figure. Data was  
832 analyzed by one-way ANOVA followed by Dunnett post-test: × p<0.05, ×× p<0.01, ××××  
833 p<0.0001 compared to the untreated CC-4533 strain.

834

835 **Figure 2.** Complementation of the insertional CLiP mutant *LMJ.RY0402.058624*, affected in  
836 the *VTC2* gene (named *Crvtc2-1*) with the coding sequence of *VTC2*. A, Physical map of the

837 *Crvtc2-1+VTC2* plasmid containing the coding sequence of *VTC2*, the constitutive promoter  
838 *PsaD* and the *APH7* resistance gene. Exons are shown in black and promoter/ 5' UTR,  
839 terminator sequences in dark grey, and the sequence encoding the catalytic site of GDP-L-  
840 galactose phosphorylase is marked as a white line. The binding sites of the primers used  
841 below are shown as black arrows; B, PCR performed using primers annealing in the promoter  
842 and *VTC2* exon 1 (P11+P12). The expected size is marked with an arrow; C, qRT-PCR  
843 performed using primers annealing to the sequence encoding the catalytic site of *VTC2*  
844 (P9+P10). The expected size is marked with an arrow; D, Ascorbate contents of CC-4533, the  
845 *Crvtc2-1* mutant and the complementation lines *Crvtc2-1+VTC2* grown for 3 days in TAP at  
846 100  $\mu\text{mole photons m}^{-2} \text{ s}^{-1}$ . Data was analyzed by one-way ANOVA followed by Dunnett  
847 post-test:  $\times p < 0.05$ ,  $\times\times\times p < 0.001$ ,  $\times\times\times\times p < 0.0001$  compared to the CC-4533 strain.  $\mu\text{E}$   
848 stands for  $\mu\text{mole photons m}^{-2} \text{ s}^{-1}$ .

849

850 **Figure 3.** Acclimation to 530  $\mu\text{mole photons m}^{-2} \text{ s}^{-1}$  of red light followed by recovery in CC-  
851 4533 (wild type) and *Crvtc2-1* cultures, grown photomixotrophically in TAP medium at 100  
852  $\mu\text{mole photons m}^{-2} \text{ s}^{-1}$ . A, NPQ kinetics; B, De-epoxidation index; C,  $F_V/F_M$  parameter  
853 measured after dark adaptation and after recovery from the 530  $\mu\text{mole photons m}^{-2} \text{ s}^{-1}$  red  
854 light; D, 684 nm/ 710 nm ratio of the 77K fluorescence spectra. Samples were collected at the  
855 growth light of 100  $\mu\text{mole photons m}^{-2} \text{ s}^{-1}$ , after 30 min of dark-adaptation, at the end of the  
856 30 min light period to 530  $\mu\text{mole photons m}^{-2} \text{ s}^{-1}$  and 15 min after the cessation of actinic  
857 illumination, as indicated by arrows in the scheme in panel A. Data was analyzed by one-way  
858 ANOVA followed by Dunnett post-test:  $\#\# p < 0.01$  compared to the CC-4533 strain at the  
859 respective time-point;  $\times p < 0.05$ ,  $\times\times p < 0.01$ ,  $\times\times\times p < 0.001$  compared to the dark-adapted CC-  
860 4533 strain.  $\mu\text{E}$  stands for  $\mu\text{mole photons m}^{-2} \text{ s}^{-1}$ .

861

862 **Figure 4.** Effects of overnight (16 h) dark acclimation on the CC-4533 and the *Crvtc2-1*  
863 (grown in TAP medium at 100  $\mu\text{mole photons m}^{-2} \text{ s}^{-1}$ ). A, Ascorbate content after 16 h of  
864 dark acclimation; B, NPQ, induced by 530  $\mu\text{mole photons m}^{-2} \text{ s}^{-1}$  of red light after overnight  
865 dark acclimation; C, de-epoxidation index, determined in the overnight dark-acclimated  
866 cultures, after strong red-light illumination and following recovery. Data was analyzed by  
867 one-way ANOVA followed by Dunnett post-test:  $\times\times\times p<0.001$ ,  $\times\times\times\times p<0.0001$  compared to  
868 the dark-acclimated CC-4533 strain.  $\mu\text{E}$  stands for  $\mu\text{mole photons m}^{-2} \text{ s}^{-1}$ .

869

870 **Figure 5.** The effects of  $\text{H}_2\text{O}_2$  and catalase on NPQ, induced by strong red light (530  $\mu\text{mole}$   
871  $\text{photons m}^{-2} \text{ s}^{-1}$ ) in the wild type (CC-4533) and the *Crvtc2-1* mutant grown in  
872 photomixotrophic conditions in TAP medium at 100  $\mu\text{mole photons m}^{-2} \text{ s}^{-1}$ . A, The effect of  
873 1.5 mM  $\text{H}_2\text{O}_2$  on NPQ induction in the CC-4533 strain; B, the effect of 1.5 mM  $\text{H}_2\text{O}_2$  on  
874 NPQ induction in the *Crvtc2-1* mutant; C, the effect of  $\text{H}_2\text{O}_2$  addition on de-epoxidation; D,  
875 the effect of catalase on NPQ induction in the CC-4533 strain; E, the effect of catalase on  
876 NPQ induction in the *Crvtc2-1* mutant. Samples were collected at the time points indicated  
877 by arrows in the schemes in panels A and B. Data was analyzed by one-way ANOVA  
878 followed by Dunnett post-test:  $\#\# p<0.01$ ,  $\#\#\# p<0.001$ ,  $\#\#\#\# p<0.0001$  compared to the  
879 untreated CC-4533 culture at the respective time-point;  $\times p<0.05$ ,  $\times\times p<0.01$ ,  $\times\times\times p<0.001$   
880 compared to the dark-adapted CC-4533 strain.  $\mu\text{E}$  stands for  $\mu\text{mole photons m}^{-2} \text{ s}^{-1}$ .

881

882 **Figure 6.** Effects of strong red light (530  $\mu\text{mole photons m}^{-2} \text{ s}^{-1}$ ) on the 137a (wild type) and  
883 the *npq1* mutant of *C. reinhardtii* grown in TAP medium at 100  $\mu\text{mole photons m}^{-2} \text{ s}^{-1}$ . A,  
884 NPQ induced by 530  $\mu\text{mole photons m}^{-2} \text{ s}^{-1}$  of red light followed by a recovery phase; B,  
885  $F_V/F_M$  value, determined before the strong red light illumination and after the recovery phase;  
886 C, Chl(a+b) content of the cultures determined before, during and after the strong red light

887 illumination; D,  $\beta$ -carotene content measured before, during and after the strong red light  
888 illumination; E, 684 nm/ 710 nm ratio of the 77K fluorescence spectra determined before,  
889 during and after the strong red light illumination; F, Ascorbate contents of the *npq1* and  
890 *Crvtc2-1* mutants and the CC-4533 and 137a wild type strains. Samples were collected at the  
891 time points indicated by arrows in the scheme in panel A. Data was analyzed by one-way  
892 ANOVA followed by Dunnett post-test: #####  $p < 0.0001$  compared to the 137a strain at the  
893 respective time-point; +  $p < 0.05$ , ++  $p < 0.01$ , ++++  $p < 0.0001$  compared to the dark-adapted  
894 137a strain;  $\times\times$   $p < 0.01$ ,  $\times\times\times\times$   $p < 0.0001$  compared to the CC-4533 strain.  $\mu\text{E}$  stands for  
895  $\mu\text{mole photons m}^{-2} \text{ s}^{-1}$ .

896

897 **Figure 7.** Acclimation to  $530 \mu\text{mole photons m}^{-2} \text{ s}^{-1}$  of red light followed by recovery in CC-  
898 4533 and *Crvtc2-1* cultures, grown photoautotrophically in HSM medium at  $530 \mu\text{mole}$   
899  $\text{photons m}^{-2} \text{ s}^{-1}$ . A, NPQ kinetics; B, De-epoxidation index; C,  $F_v/F_M$  parameter measured  
900 after dark adaptation and after recovery from the  $530 \mu\text{mole photons m}^{-2} \text{ s}^{-1}$  red light  
901 illumination; D, 684 nm/ 710 nm ratio of the 77K fluorescence spectra. The samples were  
902 collected at the growth light of  $530 \mu\text{mole photons m}^{-2} \text{ s}^{-1}$ , after 30 min of dark adaptation, at  
903 the end of the 30 min red light illumination, and 12 min after the cessation of actinic  
904 illumination, as indicated in the scheme in panel A. Data was analyzed by one-way ANOVA  
905 followed by Dunnett post-test: #####  $p < 0.0001$  compared to the CC-4533 strain at the  
906 respective time-point;  $\times$   $p < 0.05$ ,  $\times\times$   $p < 0.01$ ,  $\times\times\times$   $p < 0.001$  compared to the dark-adapted CC-  
907 4533 strain.  $\mu\text{E}$  stands for  $\mu\text{mole photons m}^{-2} \text{ s}^{-1}$ .

908

909 **Figure 8.** The effects of  $\text{H}_2\text{O}_2$  and catalase on NPQ induced by strong red light ( $530 \mu\text{mole}$   
910  $\text{photons m}^{-2} \text{ s}^{-1}$ ) in the wild type (CC-4533) and *Crvtc2-1* mutant strains grown  
911 photoautotrophically in HSM medium at  $530 \mu\text{mole photons m}^{-2} \text{ s}^{-1}$ . A, The effect of 1.5 mM

912 H<sub>2</sub>O<sub>2</sub> on NPQ induction in the CC-4533 strain; B, the effect of 1.5 mM H<sub>2</sub>O<sub>2</sub> on NPQ  
913 induction in the *Crvtc2-1* mutant; C, the effect of catalase on NPQ induction in the CC-4533  
914 strain; D, the effect of catalase on NPQ induction in the *Crvtc2-1* mutant. Data was analyzed  
915 by one-way ANOVA followed by Dunnett post-test: # p<0.05, ##### p<0.0001 compared to  
916 the untreated CC-4533 culture at the respective time-point. μE stands for μmole photons m<sup>-2</sup>  
917 s<sup>-1</sup>.



918 **Supplemental figures**

919

920 **Supplemental Fig. S1.** Confirmation of the location of the CIB1 cassette in the insertional  
921 CLiP mutant of *C. reinhardtii* (LMJ.RY0402.058624, named *Crvtc2-1*), affected in the *VTC2*  
922 gene. A, Physical map of the *VTC2* gene (obtained from Phytozome v12.1.6) with the CIB1  
923 cassette insertion site in the *Crvtc2-1* mutant. Exons are shown in black, intron in light grey.  
924 Insertion site of the CIB1 cassette is indicated by triangle and the sequencing region is  
925 marked by arrows; B, Sequencing results using the Multiple Sequence Alignment by  
926 CLUSTALW (<https://www.genome.jp/tools-bin/clustalw>).

927

928 **Supplemental Fig. S2.** Characterization of the CC-4533 (wild-type), *Crvtc2-1* mutant, and  
929 *Crvtc2-1+VTC2* complemented *C. reinhardtii* lines. A, Cell volume. B, Chl(a+b) per million  
930 cells. C, Chl *a/b* ratio. D, Increase in Chl(a+b) concentration during culture growth in  
931 mixotrophic conditions (TAP) at moderate and high light (100 and 530  $\mu\text{mole photons m}^{-2} \text{s}^{-1}$ ,  
932 respectively) and in photoautotrophic conditions (HSM) at 530  $\mu\text{mole photons m}^{-2} \text{s}^{-1}$ . E,  
933 Cellular Asc content after 24 h of growth under conditions corresponding to panel D. Data  
934 was analyzed by one-way ANOVA followed by Dunnett post-test:  $\times\times\times p<0.05$ ;  $\times\times p<0.01$ ;  
935  $\times\times\times p<0.001$ ;  $\times\times\times\times p<0.0001$  compared to the CC-4533 strain at the respective time-point  
936 and treatment.  $\mu\text{E}$  stands for  $\mu\text{mole photons m}^{-2} \text{s}^{-1}$ .

937

938 **Supplemental Fig. S3.** Western blot analysis for the semi-quantitative determination of  
939 PsbA, CP43, PSBO, PsaA, LHCSR3, PetB and RbcL contents in *C. reinhardtii* cultures  
940 grown under photomixotrophic conditions at moderate light (100  $\mu\text{mole photons m}^{-2} \text{s}^{-1}$ ) and  
941 photoautotrophic conditions at moderate and high light (100 and 530  $\mu\text{mole photons m}^{-2} \text{s}^{-1}$   
942 respectively). Samples of 1  $\mu\text{g}$  Chl(a+b) were loaded, and the first four lanes (25, 50, 100,

943 and 200% of the CC-4553 strain grown under photomixotrophic conditions at 100  $\mu\text{mole photons m}^{-2} \text{ s}^{-1}$ ) are for the approximate quantitation of the proteins. The graphics represent  
944 the densitometry analysis based on three independent experiments. Data was analyzed by  
945 one-way ANOVA followed by Dunnett post-test:  $\times < 0.05$ ,  $\times\times < 0.01$ ,  $\times\times\times < 0.001$  compared to  
946 the TAP-grown CC-4533 culture.  $\mu\text{E}$  stands for  $\mu\text{mole photons m}^{-2} \text{ s}^{-1}$ .

948

949 **Supplemental Fig. S4.** NPQ kinetics induced by strong red light (530  $\mu\text{mole photons m}^{-2} \text{ s}^{-1}$ )  
950 in cultures grown either in photomixotrophic conditions in TAP medium at 100  $\mu\text{mole photons m}^{-2} \text{ s}^{-1}$   
951 or in photoautotrophic conditions in HSM medium at 530  $\mu\text{mole photons m}^{-2} \text{ s}^{-1}$ . A and B, NPQ kinetics of the CC-4533 (wild type), *Crvtc2-1* and *Crvtc2-1+VTC2*  
952 complemented lines; C and D, NPQ kinetics of the *VTC2-amiRNA* and empty vector (*EV2*)  
953 lines. Data was analyzed by one-way ANOVA followed by Dunnett post-test:  $\# < 0.05$ ,  
954  $\#\# < 0.01$  compared to the untreated CC-4533 culture at the respective time-point.  $\mu\text{E}$  stands  
955 for  $\mu\text{mole photons m}^{-2} \text{ s}^{-1}$ .

957

958 **Supplemental Fig. S5.** Carotenoid contents of the *Crvtc2-1* mutant and the wild type (CC-  
959 4533) during NPQ induction by strong red light (530  $\mu\text{mole photons m}^{-2} \text{ s}^{-1}$ ). The cultures  
960 were grown in photomixotrophic conditions in TAP medium at 100  $\mu\text{mole photons m}^{-2} \text{ s}^{-1}$ . A,  
961 Violaxanthin; B, antheraxanthin; C, zeaxanthin; D,  $\beta$ -carotene; E, lutein concentrations. Data  
962 was analyzed by one-way ANOVA followed by Dunnett post-test:  $\times p < 0.05$ ,  $\times\times p < 0.01$ ,  
963  $\times\times\times p < 0.0001$  compared to the dark-adapted CC-4533 strain.

964

965 **Supplemental Fig. S6.** NPQ induction in the *stt7-9* mutant of *C. reinhardtii* and in *cw15-412*,  
966 used as a control strain, grown in TAP medium at 100  $\mu\text{mole photons m}^{-2} \text{ s}^{-1}$ . A, NPQ  
967 kinetics, induced by 530  $\mu\text{mole photons m}^{-2} \text{ s}^{-1}$  of red light and followed by a recovery phase;

968 B, de-epoxidation index, determined in the growth light, after 30 min of dark adaptation,  
969 following illumination with strong red light, and after the recovery phase, as indicated in the  
970 scheme in panel A. Data was analyzed by one-way ANOVA followed by Dunnett post-test:  
971 #<0.05, #####<0.0001 compared to the *cw15-412* strain at the respective time-point; ××  
972 p<0.01, ×××× p<0.0001 compared to the dark-adapted *cw15-412* strain.  $\mu\text{E}$  stands for  $\mu\text{mole}$   
973  $\text{photons m}^{-2} \text{s}^{-1}$ .

974

975 **Supplemental Fig. S7.** Carotenoid contents of the *Crvtc2-1* mutant and the wild type (CC-  
976 4533) during NPQ induction upon strong red light ( $530 \mu\text{mole photons m}^{-2} \text{s}^{-1}$ ). The cultures  
977 were grown in photoautotrophic conditions in HSM medium at  $530 \mu\text{mole photons m}^{-2} \text{s}^{-1}$ . A,  
978 Violaxanthin; B, antheraxanthin; C, zeaxanthin; D,  $\beta$ -carotene; E, lutein concentrations. Data  
979 was analyzed by one-way ANOVA followed by Dunnett post-test: × p<0.05, ×× p<0.01, ×××  
980 p<0.001, ×××× p<0.0001 compared to the dark-adapted CC-4533 strain.

981

982 **Supplemental Fig. S8.** Acclimation to  $530 \mu\text{mole photons m}^{-2} \text{s}^{-1}$  of red light followed by  
983 recovery in CC-4533 and *Crvtc2-1* cultures, grown photoautotrophically in HSM medium at  
984  $100 \mu\text{mole photons m}^{-2} \text{s}^{-1}$ . A, NPQ kinetics; B, De-epoxidation index; C,  $F_V/F_M$  parameter  
985 measured after dark adaptation and after strong red light illumination. D, 684 nm/ 710 nm  
986 ratio of the 77K fluorescence spectra. Samples were collected at the growth light of  $100$   
987  $\mu\text{mole photons m}^{-2} \text{s}^{-1}$ , after 30 min of dark-adaptation, at the end of the 30 min strong red  
988 light illumination, and 12 min after the cessation of actinic illumination, as indicated by  
989 arrows in the scheme in panel A. E, The effect of 1.5 mM  $\text{H}_2\text{O}_2$  on NPQ induction in the CC-  
990 4533 strain; F, the effect of 1.5 mM  $\text{H}_2\text{O}_2$  on NPQ induction in the *Crvtc2-1* mutant; G, the  
991 effect of catalase on NPQ induction in the CC-4533 strain; H, the effect of catalase on NPQ  
992 induction in the *Crvtc2-1* mutant. Data was analyzed by one-way ANOVA followed by

- 993 Dunnett post-test: × p<0.05, ×× p<0.01, ×××× p<0.0001 compared to the dark-adapted CC-
- 994 4533 strain. μE stands for μmole photons m<sup>-2</sup> s<sup>-1</sup>.

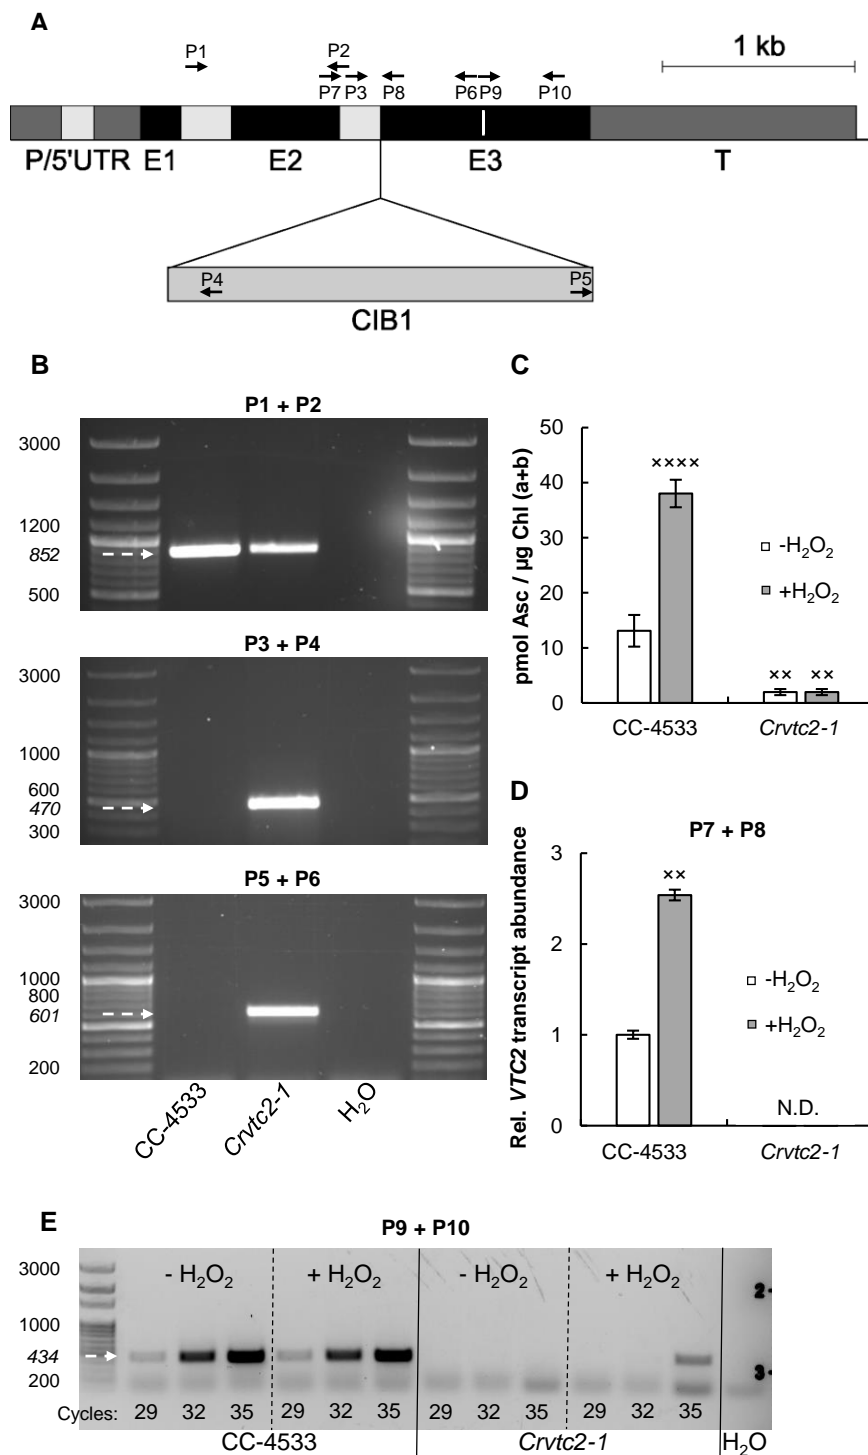

**Figure 1. Characterization of an insertional CLiP mutant of *C. reinhardtii* (LMJ.RY0402.058624, named *Crvtc2-1*), affected in the *VTC2* gene that encodes GDP-L-galactose phosphorylase.** A, Physical map of the *VTC2* gene (obtained from Phytozome v12.1.6) with the CIB1 cassette insertion site in the *Crvtc2-1* mutant. Exons are shown in black, introns in light grey, and promoter/ 5' UTR and terminator sequences in dark grey. Insertion site of the CIB1 cassette is indicated by triangle and the binding sites of the primers used for genotyping and gene expression analysis of *Crvtc2-1* are shown as black arrows. The sequence encoding the catalytic site of GDP-L-galactose phosphorylase is marked as a white line within Exon 3; B, PCR performed using primers annealing upstream the predicted cassette insertion site in *VTC2* (top panel, using primers P1+P2), and using primers amplifying the 5' and 3' genome-cassette junctions (using primers P3+P4 and P5+P6, respectively, middle and bottom panels). The expected sizes are marked with arrows; C, Ascorbate contents of the wild type (CC-4533) and the *Crvtc2-1* mutant grown mixotrophically in TAP medium at moderate light with and without the addition of 1.5 mM H<sub>2</sub>O<sub>2</sub>; D, Transcript levels of *VTC2*, as determined by real-time qRT-PCR in cultures supplemented or not with H<sub>2</sub>O<sub>2</sub>, using primers P7+P8. E, qRT-PCR analysis using primers P9+P10, spanning the sequence that encodes the catalytic site of GDP-L-galactose phosphorylase. The number of PCR cycles is indicated at the bottom of the figure. Data was analyzed by one-way ANOVA followed by Dunnett post-test: \* p<0.05, \*\* p<0.01, \*\*\*\* p<0.0001 compared to the untreated CC-4533 strain.

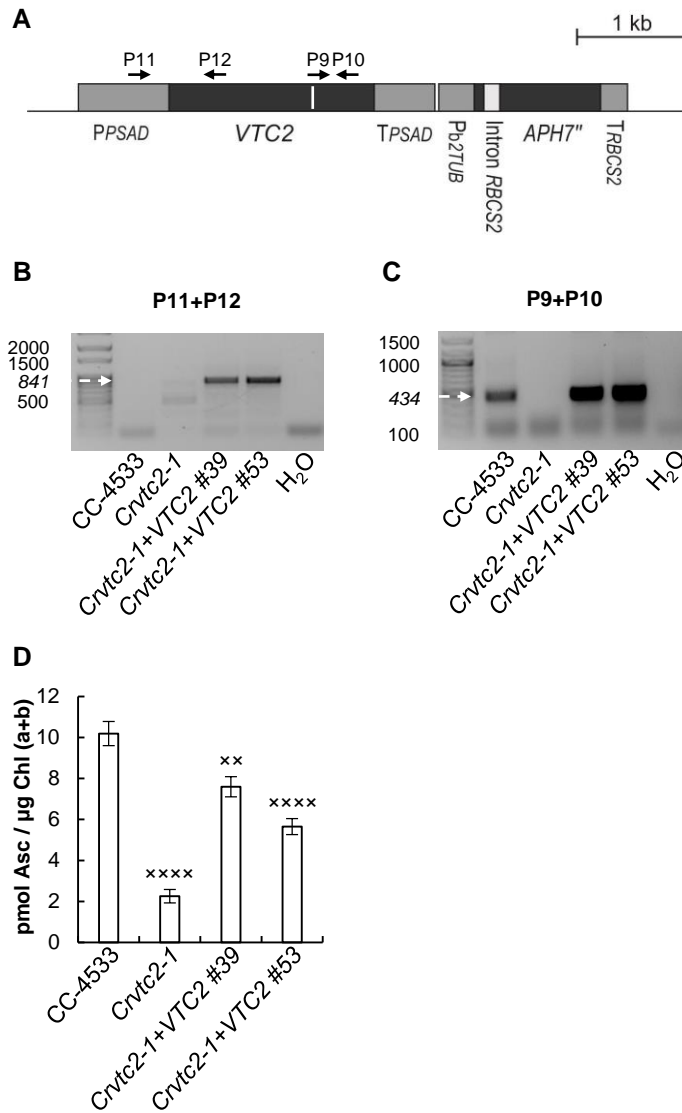

**Figure 2 – Complementation of the insertional CLiP mutant *LMJ.RY0402.058624*, affected in the *VTC2* gene (named *Crvtc2-1*) with the coding sequence of *VTC2*.** A, Physical map of the *Crvtc2-1+VTC2* plasmid containing the coding sequence of *VTC2*, the constitutive promoter *PsaD* and the *APH7<sup>r</sup>* resistance gene. Exons are shown in black and promoter/ 5' UTR, terminator sequences in dark grey, and the sequence encoding the catalytic site of GDP-L-galactose phosphorylase is marked as a white line. The binding sites of the primers used below are shown as black arrows; B, PCR performed using primers annealing in the promoter and *VTC2* exon 1 (P11+P12). The expected size is marked with an arrow; C, qRT-PCR performed using primers annealing to the sequence encoding the catalytic site of *VTC2* (P9+P10). The expected size is marked with an arrow; D, Ascorbate contents of CC-4533, the *Crvtc2-1* mutant and the complementation lines *Crvtc2-1+VTC2* grown for 3 days in TAP at 100  $\mu\text{E photons m}^{-2} \text{s}^{-1}$ . Data was analyzed by one-way ANOVA followed by Dunnett post-test:  $\times p < 0.05$ ,  $\times\times\times p < 0.001$ ,  $\times\times\times\times p < 0.0001$  compared to the CC-4533 strain.  $\mu\text{E}$  stands for  $\mu\text{mole photons m}^{-2} \text{s}^{-1}$ .

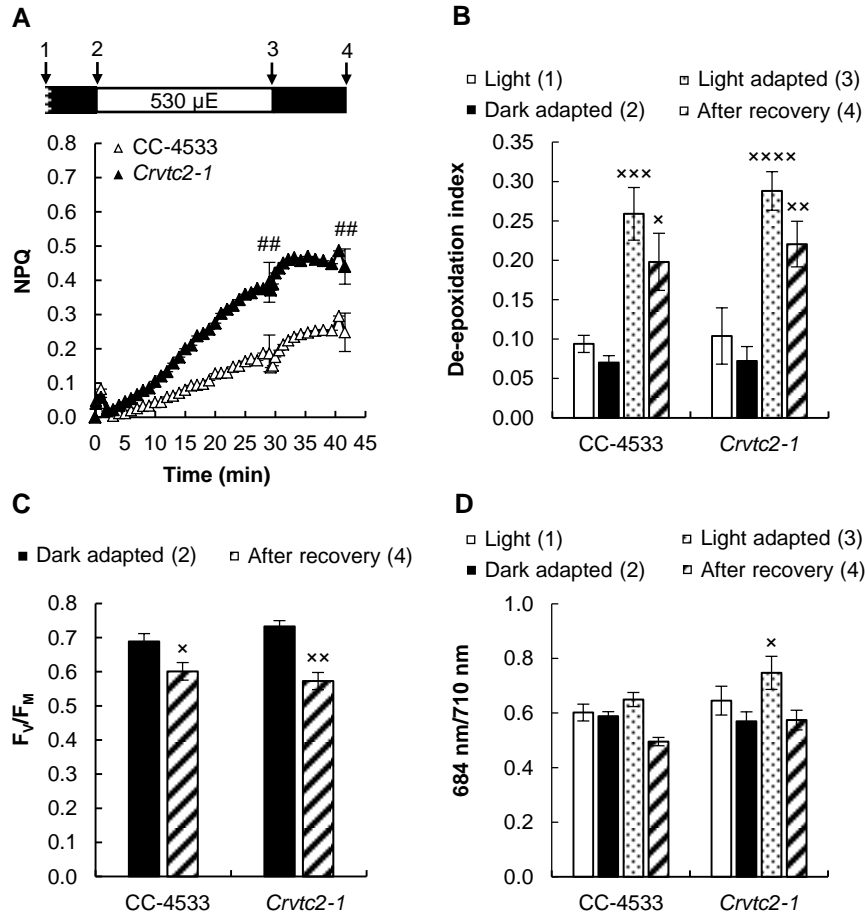

**Figure 3 – Acclimation to 530  $\mu\text{mole photons m}^{-2} \text{s}^{-1}$  of red light followed by recovery in CC-4533 (wild type) and *Crvtc2-1* cultures, grown photomixotrophically in TAP medium at 100  $\mu\text{mole photons m}^{-2} \text{s}^{-1}$ .** A, NPQ kinetics; B, De-epoxidation index; C,  $F_v/F_m$  parameter measured after dark adaptation and after recovery from the 530  $\mu\text{mole photons m}^{-2} \text{s}^{-1}$  red light; D, 684 nm/ 710 nm ratio of the 77K fluorescence spectra. Samples were collected at the growth light of 100  $\mu\text{mole photons m}^{-2} \text{s}^{-1}$ , after 30 min of dark-adaptation, at the end of the 30 min light period to 530  $\mu\text{mole photons m}^{-2} \text{s}^{-1}$  and 15 min after the cessation of actinic illumination, as indicated by arrows in the scheme in panel A. Data was analyzed by one-way ANOVA followed by Dunnett post-test: ##  $p < 0.01$  compared to the CC-4533 strain at the respective time-point; \*  $p < 0.05$ , \*\*  $p < 0.01$ , \*\*\*  $p < 0.001$  compared to the dark-adapted CC-4533 strain.  $\mu\text{E}$  stands for  $\mu\text{mole photons m}^{-2} \text{s}^{-1}$ .

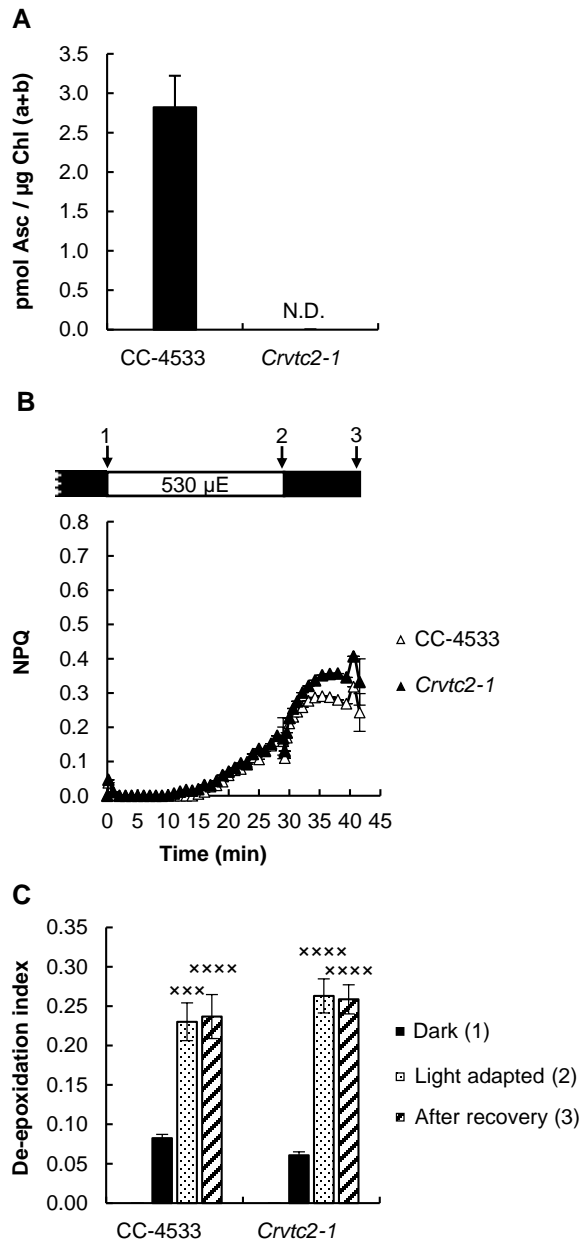

**Figure 4 – Effects of overnight (16 h) dark acclimation on the CC-4533 and the *Crvtc2-1* (grown in TAP medium at 100  $\mu\text{mole photons m}^{-2} \text{s}^{-1}$ ).** A, Ascorbate content after 16 h of dark acclimation; B, NPQ, induced by 530  $\mu\text{mole photons m}^{-2} \text{s}^{-1}$  of red light after overnight dark acclimation; C, de-epoxidation index, determined in the overnight dark-acclimated cultures, after strong red-light illumination and following recovery. Data was analyzed by one-way ANOVA followed by Dunnett post-test: xxx  $p < 0.001$ , xxxx  $p < 0.0001$  compared to the dark-acclimated CC-4533 strain.  $\mu\text{E}$  stands for  $\mu\text{mole photons m}^{-2} \text{s}^{-1}$ .



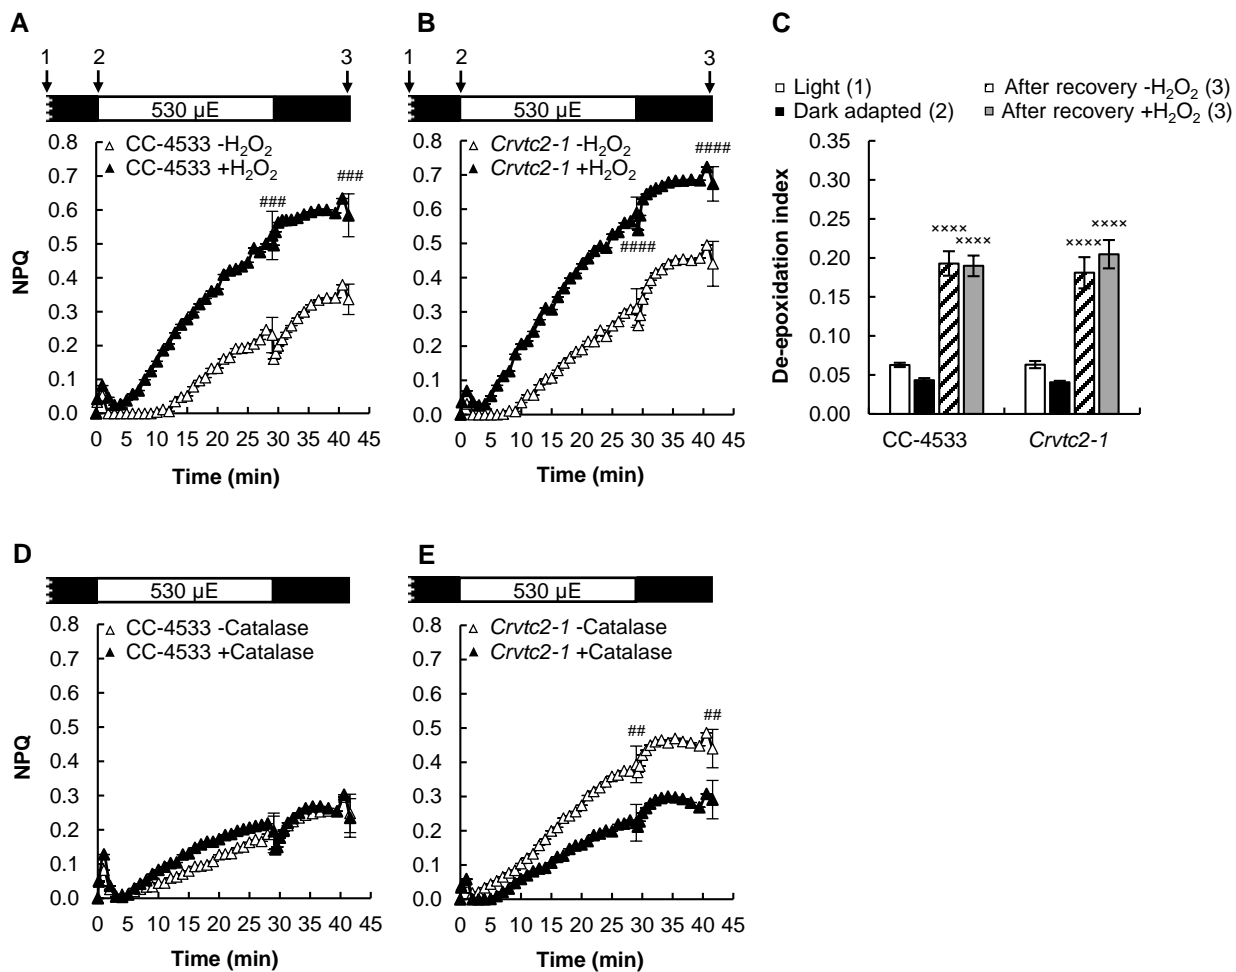

**Figure 5 – The effects of H<sub>2</sub>O<sub>2</sub> and catalase on NPQ, induced by strong red light (530  $\mu$ mole photons m<sup>-2</sup> s<sup>-1</sup>) in the wild type (CC-4533) and the *Crvtc2-1* mutant grown in photomixotrophic conditions in TAP medium at 100  $\mu$ mole photons m<sup>-2</sup> s<sup>-1</sup>.** A, The effect of 1.5 mM H<sub>2</sub>O<sub>2</sub> on NPQ induction in the CC-4533 strain; B, the effect of 1.5 mM H<sub>2</sub>O<sub>2</sub> on NPQ induction in the *Crvtc2-1* mutant; C, the effect of H<sub>2</sub>O<sub>2</sub> addition on de-epoxidation; D, the effect of catalase on NPQ induction in the CC-4533 strain; E, the effect of catalase on NPQ induction in the *Crvtc2-1* mutant. Samples were collected at the time points indicated by arrows in the schemes in panels A and B. Data was analyzed by one-way ANOVA followed by Dunnett post-test: ## p<0.01, ### p<0.001, ##### p<0.0001 compared to the untreated CC-4533 culture at the respective time-point; \* p<0.05, \*\* p<0.01, \*\*\* p<0.001 compared to the dark-adapted CC-4533 strain.  $\mu$ E stands for  $\mu$ mole photons m<sup>-2</sup> s<sup>-1</sup>.

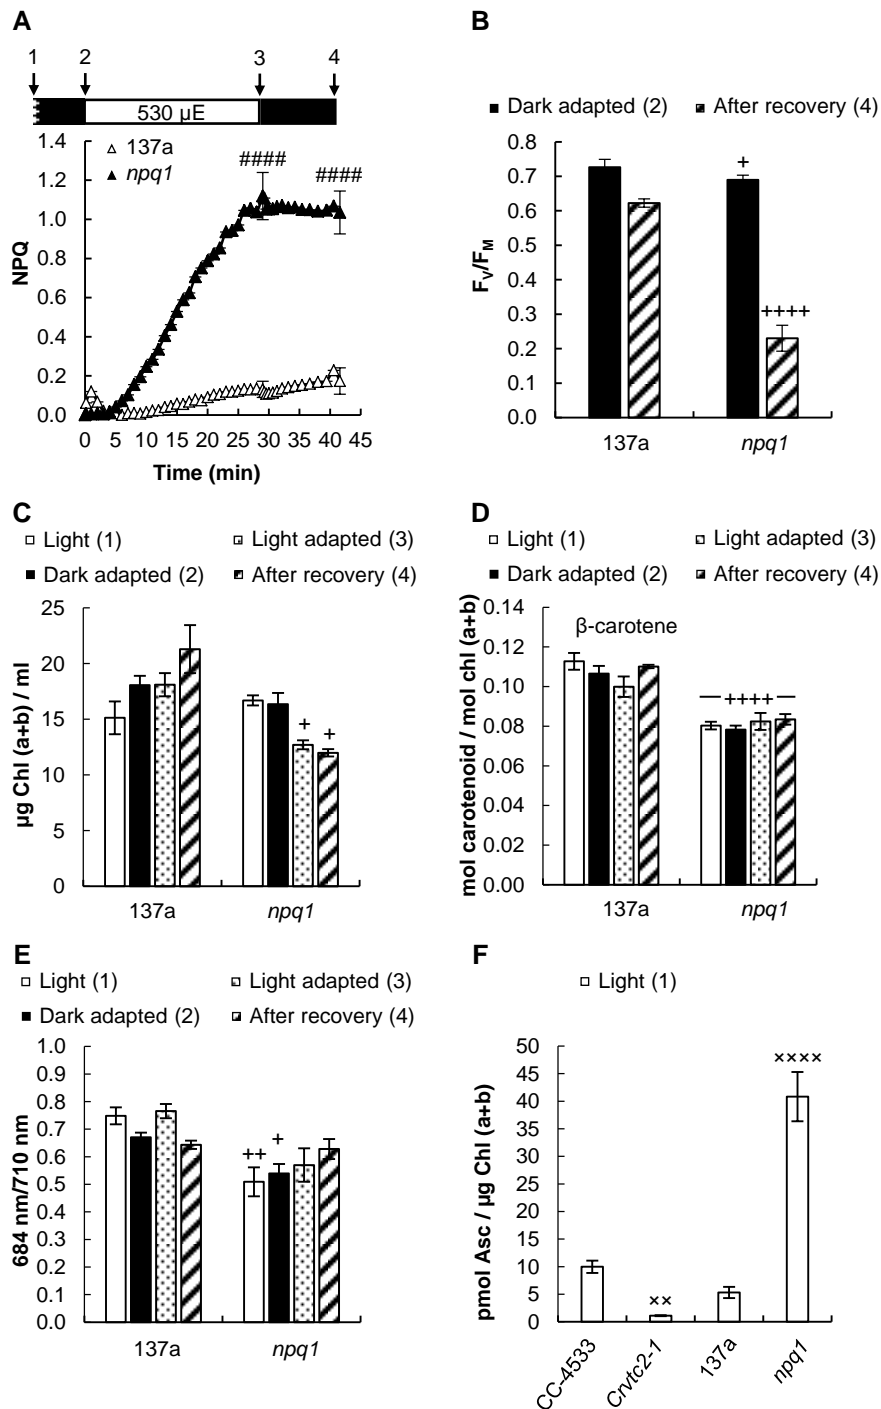

**Figure 6 – Effects of strong red light ( $530 \mu\text{mol photons m}^{-2} \text{s}^{-1}$ ) on the 137a (wild type) and the *npq1* mutant of *C. reinhardtii* grown in TAP medium at  $100 \mu\text{mol photons m}^{-2} \text{s}^{-1}$ .** A, NPQ induced by  $530 \mu\text{mol photons m}^{-2} \text{s}^{-1}$  of red light followed by a recovery phase; B,  $F_v/F_m$  value, determined before the strong red light illumination and after the recovery phase; C, Chl(a+b) content of the cultures determined before, during and after the strong red light illumination; D,  $\beta$ -carotene content measured before, during and after the strong red light illumination; E, 684 nm/ 710 nm ratio of the 77K fluorescence spectra determined before, during and after the strong red light illumination; F, Ascorbate contents of the *npq1* and *Crvtc2-1* mutants and the CC-4533 and 137a wild type strains. Samples were collected at the time points indicated by arrows in the scheme in panel A. Data was analyzed by one-way ANOVA followed by Dunnett post-test: #####  $p < 0.0001$  compared to the 137a strain at the respective time-point; +  $p < 0.05$ , ++  $p < 0.01$ , ++++  $p < 0.0001$  compared to the dark-adapted 137a strain; xx  $p < 0.01$ , xxxxx  $p < 0.0001$  compared to the CC-4533 strain.  $\mu\text{E}$  stands for  $\mu\text{mol photons m}^{-2} \text{s}^{-1}$ .

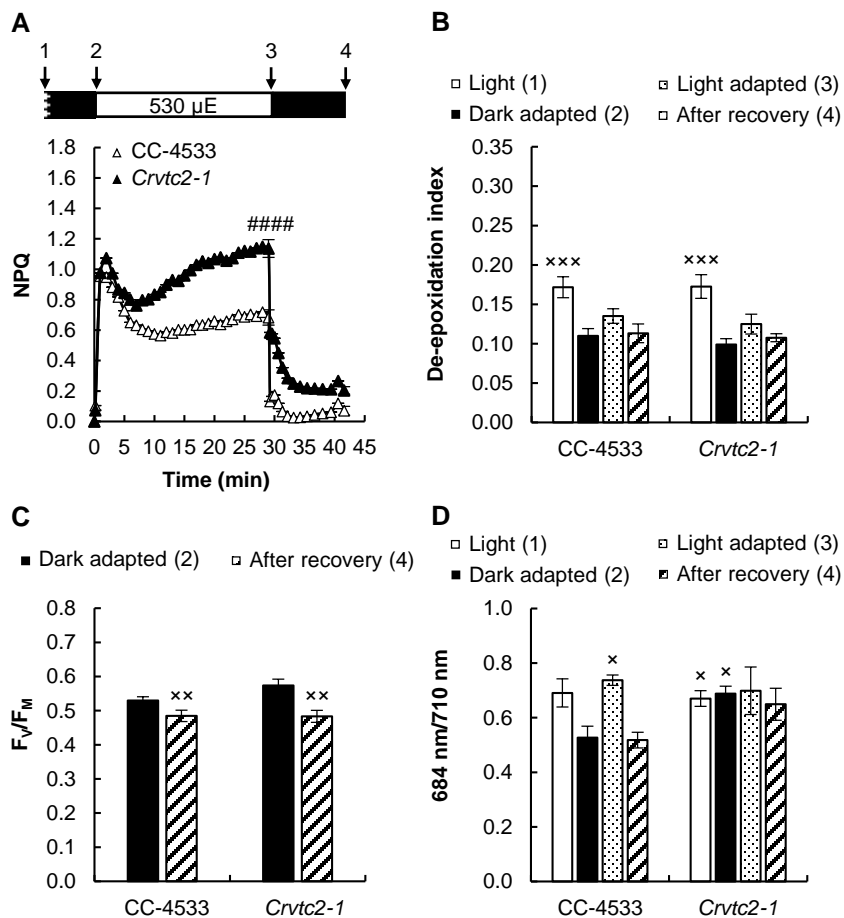

**Figure 7 – Acclimation to 530  $\mu\text{mole photons m}^{-2} \text{s}^{-1}$  of red light followed by recovery in CC-4533 and *Crvtc2-1* cultures, grown photoautotrophically in HSM medium at 530  $\mu\text{mole photons m}^{-2} \text{s}^{-1}$ .** A, NPQ kinetics; B, De-epoxidation index; C,  $F_v/F_m$  parameter measured after dark adaptation and after recovery from the 530  $\mu\text{mole photons m}^{-2} \text{s}^{-1}$  red light illumination; D, 684 nm/ 710 nm ratio of the 77K fluorescence spectra. The samples were collected at the growth light of 530  $\mu\text{mole photons m}^{-2} \text{s}^{-1}$ , after 30 min of dark adaptation, at the end of the 30 min red light illumination, and 12 min after the cessation of actinic illumination, as indicated in the scheme in panel A. Data was analyzed by one-way ANOVA followed by Dunnett post-test: ####  $p < 0.0001$  compared to the CC-4533 strain at the respective time-point; x  $p < 0.05$ , xx  $p < 0.01$ , xxx  $p < 0.001$  compared to the dark-adapted CC-4533 strain.  $\mu\text{E}$  stands for  $\mu\text{mole photons m}^{-2} \text{s}^{-1}$ .

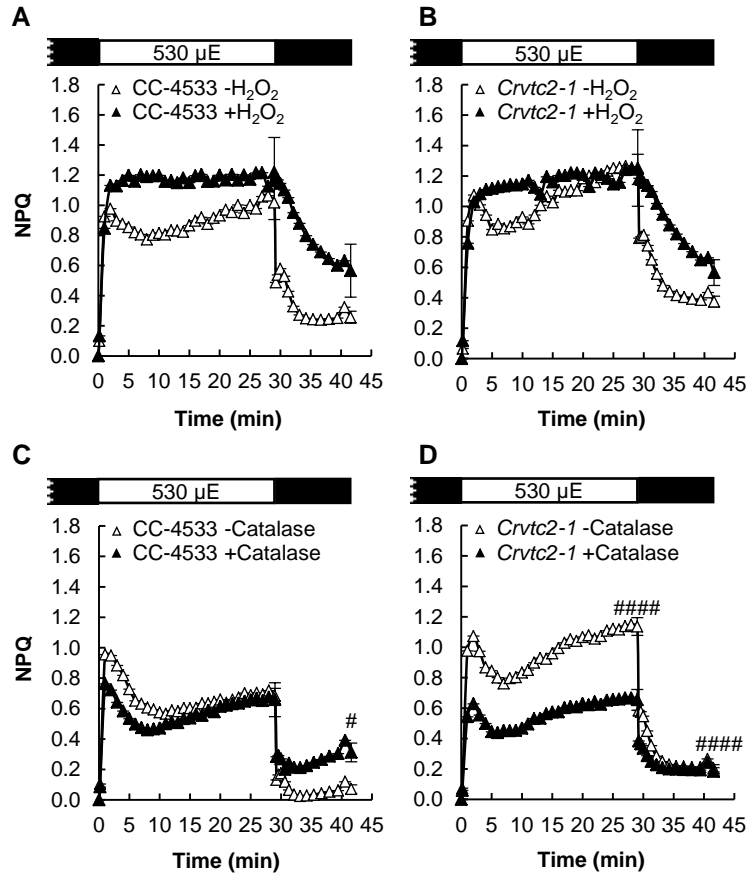

**Figure 8 – The effects of H<sub>2</sub>O<sub>2</sub> and catalase on NPQ induced by strong red light (530  $\mu\text{mole photons m}^{-2} \text{s}^{-1}$ ) in the wild type (CC-4533) and *Crvtc2-1* mutant strains grown photoautotrophically in HSM medium at 530  $\mu\text{mole photons m}^{-2} \text{s}^{-1}$ .** A, The effect of 1.5 mM H<sub>2</sub>O<sub>2</sub> on NPQ induction in the CC-4533 strain; B, the effect of 1.5 mM H<sub>2</sub>O<sub>2</sub> on NPQ induction in the *Crvtc2-1* mutant; C, the effect of catalase on NPQ induction in the CC-4533 strain; D, the effect of catalase on NPQ induction in the *Crvtc2-1* mutant. Data was analyzed by one-way ANOVA followed by Dunnett post-test: #  $p < 0.05$ , ####  $p < 0.0001$  compared to the untreated CC-4533 culture at the respective time-point.  $\mu\text{E}$  stands for  $\mu\text{mole photons m}^{-2} \text{s}^{-1}$ .

## Parsed Citations

**Adams WWIII, Muller O, Cohu CM, Demmig-Adams B (2013) May photoinhibition be a consequence, rather than a cause, of limited plant productivity? Photosynth Res 117:31-44**

Pubmed: [Author and Title](#)

Google Scholar: [Author Only Title Only Author and Title](#)

**Allorent G, Tokutsu R, Roach T, Peers G, Cardol P, Girard-Bascou J, Seigneurin-Berny D, Petroustos D, Kuntz M, Breyton C, Franck F, Wollman FA, Niyogi KK, Krieger-Liszskay A, Minagawa J, Finazzi G (2013) A dual strategy to cope with high light in *Chlamydomonas reinhardtii*. Plant Cell 25:545-557**

Pubmed: [Author and Title](#)

Google Scholar: [Author Only Title Only Author and Title](#)

**Anwaruzzaman M, Chin BL, Li X-P, Lohr M, Martinez DA, Niyogi KK (2004) Genomic analysis of mutants affecting xanthophyll biosynthesis and regulation of photosynthetic light harvesting in *Chlamydomonas reinhardtii*. Photosynth Res 82:265-276**

Pubmed: [Author and Title](#)

Google Scholar: [Author Only Title Only Author and Title](#)

**Arnoux P, Morosinotto T, Saga G, Bassi R, Pignol D (2009) A structural basis for the pH-dependent xanthophyll cycle in *Arabidopsis thaliana*. Plant Cell 21: 2036-2044**

Pubmed: [Author and Title](#)

Google Scholar: [Author Only Title Only Author and Title](#)

**Asada K (2006) Production and scavenging of reactive oxygen species in chloroplasts and their functions. Plant Physiol 141: 391-396**

Pubmed: [Author and Title](#)

Google Scholar: [Author Only Title Only Author and Title](#)

**Avenson TJ, Ahn TK, Zigmantas D, Niyogi KK, Li Z, Ballottari M, Bassi R, Fleming GR (2008) Zeaxanthin radical cation formation in minor light-harvesting complexes of higher plant antenna. J Biol Chem 283:3550-3558**

Pubmed: [Author and Title](#)

Google Scholar: [Author Only Title Only Author and Title](#)

**Azzabi G, Pinnola A, Betterle N, Bassi R, Alboresi A (2012) Enhancement of non-photo de-epoxidation index chemical quenching in the bryophyte *Physcomitrella patens* during acclimation to salt and osmotic stress. Plant Cell Physiol 53: 1815-1825**

Pubmed: [Author and Title](#)

Google Scholar: [Author Only Title Only Author and Title](#)

**Barahimpour R, Strenkert D, Neupert J, Schroda M, Merchant SS, Bock R (2015) Dissecting the contributions of GC content and codon usage to gene expression in the model alga *Chlamydomonas reinhardtii*. Plant J 84: 704-717**

Pubmed: [Author and Title](#)

Google Scholar: [Author Only Title Only Author and Title](#)

**Baroli I, Do AD, Yamane T, Niyogi KK (2003) Zeaxanthin accumulation in the absence of a functional xanthophyll cycle protects *Chlamydomonas reinhardtii* from photooxidative stress. Plant Cell 15: 992-1008**

Pubmed: [Author and Title](#)

Google Scholar: [Author Only Title Only Author and Title](#)

**Bratt C, Arvidsson P, Carlsson M, Akerlund H (1995) Regulation of violaxanthin de-epoxidase activity by pH and ascorbate. Photosynth Res 45: 169-175**

Pubmed: [Author and Title](#)

Google Scholar: [Author Only Title Only Author and Title](#)

**Bonente G, Ballottari M, Truong T, Morosinotto T, Ahn T, Fleming G, Niyogi K, Bassi R (2011) Analysis of LhcSR3, a protein essential for feedback de-excitation in the green alga *Chlamydomonas reinhardtii*. PLoS Biol 9:e1000577**

Pubmed: [Author and Title](#)

Google Scholar: [Author Only Title Only Author and Title](#)

**Bradbury LMT, Shumskaya M, Tzfadia O, Wu S-B, Kennelly EK, Wurtzelt ET (2012) Lycopene cyclase paralog CruP protects against reactive oxygen species in oxygenic photosynthetic organisms. Proc Natl Acad Sci USA 109:E1888-E1897**

Pubmed: [Author and Title](#)

Google Scholar: [Author Only Title Only Author and Title](#)

**Chaux F, Johnson X, Auroy P, Beyly-Adriano A, Te I, Cuiné S, Peltier G (2017) PGRL1 and LHCSR3 compensate for each other in controlling photosynthesis and avoiding photosystem I photoinhibition during high light acclimation of *Chlamydomonas* cells. Mol Plant 10:216-218**

Pubmed: [Author and Title](#)

Google Scholar: [Author Only Title Only Author and Title](#)

**Christa G, Cruz S, Jahns P, de Vries J, Cartaxana P, Esteves AC, Serôdio J, Gould SB (2017) Photoprotection in a monophyletic branch of chlorophyte algae is independent of energy-dependent quenching (qE). New Phytol 214: 1132-1144**

Pubmed: [Author and Title](#)

Google Scholar: [Author Only Title Only Author and Title](#)

**Depège N, Bellafiore S, Rochaix JD (2003) Role of chloroplast protein kinase Stt7 in LHCII phosphorylation and state transition in**

**Chlamydomonas. Science 299: 1572-1575**

Pubmed: [Author and Title](#)

Google Scholar: [Author Only](#) [Title Only](#) [Author and Title](#)

**Dowdle J, Ishikawa T, Gatzek S, Rolinski S, Smirnov N (2007) Two genes in Arabidopsis thaliana encoding GDP-L-galactose phosphorylase are required for ascorbate biosynthesis and seedling viability. Plant J 52: 673-689**

Pubmed: [Author and Title](#)

Google Scholar: [Author Only](#) [Title Only](#) [Author and Title](#)

**Erickson E, Wakao S, Niyogi KK (2015) Light stress and photoprotection in Chlamydomonas reinhardtii. Plant J 82:449-465**

Pubmed: [Author and Title](#)

Google Scholar: [Author Only](#) [Title Only](#) [Author and Title](#)

**Fernie AR, Tóth SZ (2015) Identification of the elusive chloroplast ascorbate transporter extends the substrate specificity of the PHT family. Mol Plant 8:674-676**

Pubmed: [Author and Title](#)

Google Scholar: [Author Only](#) [Title Only](#) [Author and Title](#)

**Finazzi G, Johnson GN, Dall'Osto L, Zito F, Bonente G, Bassi R, Wollman F-A (2006) Nonphotochemical quenching of chlorophyll fluorescence in Chlamydomonas reinhardtii. Biochemistry 45:1490-1498**

Pubmed: [Author and Title](#)

Google Scholar: [Author Only](#) [Title Only](#) [Author and Title](#)

**Foyer CH, Shigeoka S (2011) Understanding oxidative stress and antioxidant functions to enhance photosynthesis. Plant Physiol 155: 93-100**

Pubmed: [Author and Title](#)

Google Scholar: [Author Only](#) [Title Only](#) [Author and Title](#)

**Gest N, Gautier H, Stevens R (2013) Ascorbate as seen through plant evolution: the rise of a successful molecule? J Exp Bot 64:33-53**

Pubmed: [Author and Title](#)

Google Scholar: [Author Only](#) [Title Only](#) [Author and Title](#)

**Grouneva I, Jakob T, Wilhelm C, Goss R (2006) Influence of ascorbate and pH on the activity of the diatom xanthophyll cycle-enzyme diadinoxanthin de-epoxidase. Physiol Plant 126:205-211**

Pubmed: [Author and Title](#)

Google Scholar: [Author Only](#) [Title Only](#) [Author and Title](#)

**Hager A, Holocher K (1994) Localization of the xanthophyll-cycle enzyme violaxanthin de-epoxidase within the thylakoid lumen and abolition of its mobility by a (light-dependent) pH decrease. Planta 192: 581-589**

Pubmed: [Author and Title](#)

Google Scholar: [Author Only](#) [Title Only](#) [Author and Title](#)

**Hallin EI, Hasan M, Guo K, Åkerlund H-E (2016) Molecular studies on structural changes and oligomerisation of violaxanthin de-epoxidase associated with the pH-dependent activation. Photosynth Res 129: 29-41**

Pubmed: [Author and Title](#)

Google Scholar: [Author Only](#) [Title Only](#) [Author and Title](#)

**Hieber AD, Bugos RC, Yamamoto HY (2000) Plant lipocalins: violaxanthin de-epoxidase and zeaxanthin epoxidase. Biochim Biophys Acta BBA - Protein Struct Mol Enzymol 1482: 84-91**

Pubmed: [Author and Title](#)

Google Scholar: [Author Only](#) [Title Only](#) [Author and Title](#)

**Holt NE, Zigmantas D, Valkunas L, Li X-P, Niyogi KK, Fleming GR (2005) Carotenoid cation formation and the regulation of photosynthetic light harvesting. Science 307:433-436**

Pubmed: [Author and Title](#)

Google Scholar: [Author Only](#) [Title Only](#) [Author and Title](#)

**Holub O, Seufferheld MJ, Gohlke C, Heiss GJ, Clegg RM (2007) Fluorescence lifetime imaging microscopy of Chlamydomonas reinhardtii: non-photochemical quenching mutants and the effect of photosynthetic inhibitors on the slow chlorophyll fluorescence transient. J Microsc 226: 90-120**

Pubmed: [Author and Title](#)

Google Scholar: [Author Only](#) [Title Only](#) [Author and Title](#)

**Ivanov B, Asada K, Edwards GE (2007) Analysis of donors of electrons to photosystem I and cyclic electron flow by redox kinetics of P700 in chloroplasts of isolated bundle sheath strands of maize. Photosynth Res 92:65-74**

Pubmed: [Author and Title](#)

Google Scholar: [Author Only](#) [Title Only](#) [Author and Title](#)

**Iwai M, Kato N, Minagawa J (2007) Distinct physiological responses to a high light and low CO2 environment revealed by fluorescence quenching in photoautotrophically grown Chlamydomonas reinhardtii. Photosynth Res 94:307-314**

Pubmed: [Author and Title](#)

Google Scholar: [Author Only](#) [Title Only](#) [Author and Title](#)

**Jeffrey SW, Mantoura RFC, Wright SW (1997) Phytoplankton pigments in oceanography: guidelines to modern methods. (Paris: UNESCO Publishing)**

- Pubmed: [Author and Title](#)  
Google Scholar: [Author Only Title Only Author and Title](#)
- Johnson X, Alric J (2012) Interaction between starch breakdown, acetate assimilation, and photosynthetic cyclic electron flow in *Chlamydomonas reinhardtii*. J Biol Chem 287:26445-26452**  
Pubmed: [Author and Title](#)  
Google Scholar: [Author Only Title Only Author and Title](#)
- Johnson MP, Davison PA, Ruban AV, Horton P (2008) The xanthophyll cycle pool size controls the kinetics of non-photochemical quenching in *Arabidopsis thaliana*. FEBS Lett 582:259-263**  
Pubmed: [Author and Title](#)  
Google Scholar: [Author Only Title Only Author and Title](#)
- Kanazawa A, Kramer DM (2002). In vivo modulation of nonphotochemical exciton quenching (NPQ) by regulation of the chloroplast ATP synthase. Proc Natl Acad Sci USA 99:12789-12794**  
Pubmed: [Author and Title](#)  
Google Scholar: [Author Only Title Only Author and Title](#)
- Kovács L, Vidal-Meireles A, Nagy V, Tóth SZ (2016) Quantitative determination of ascorbate from the green alga *Chlamydomonas reinhardtii* by HPLC. Bio-Protoc 6:e2067**  
Pubmed: [Author and Title](#)  
Google Scholar: [Author Only Title Only Author and Title](#)
- Lemelle S, Willig A, Depège-Fargeix N, Delessert C, Bassi R, Rochaix J-D (2009) Analysis of the chloroplast protein kinase Stt7 during state transitions. PLoS Biol 7: e1000045**  
Pubmed: [Author and Title](#)  
Google Scholar: [Author Only Title Only Author and Title](#)
- Li S, Liu L, Zhuang X, Yu Y, Liu X, Cui X, Ji L, Pan Z, Cao X, Mo B, Zhang F, Raikhel N, Jiang L, and Chen X (2013) MicroRNAs inhibit the translation of target mRNAs on the endoplasmic reticulum in *Arabidopsis*. Cell 153: 562-574**  
Pubmed: [Author and Title](#)  
Google Scholar: [Author Only Title Only Author and Title](#)
- Li Z, Peers G, Dent RM, Bai Y, Yang SY, Apel W, Leonelli L, Niyogi KK (2016a) Evolution of an atypical de-epoxidase for photoprotection in the green lineage. Nat Plants 2: 16140**  
Pubmed: [Author and Title](#)  
Google Scholar: [Author Only Title Only Author and Title](#)
- Li X, Zhang R, Patena W, Gang SS, Blum SR, Ivanova N, Yue R, Robertson JM, Lefebvre PA, Fitz-Gibbon ST, Grossman AR, Jonikas MC (2016b) An indexed, mapped mutant library enables reverse genetics studies of biological processes in *Chlamydomonas reinhardtii*. Plant Cell 28: 367-387**  
Pubmed: [Author and Title](#)  
Google Scholar: [Author Only Title Only Author and Title](#)
- Marschall M, Proctor MCF (2004) Are bryophytes shade plants? Photosynthetic light responses and proportions of chlorophyll a, chlorophyll b and total carotenoids. Ann Bot 94: 593-603**  
Pubmed: [Author and Title](#)  
Google Scholar: [Author Only Title Only Author and Title](#)
- Müller-Moulé P, Conklin PL, Niyogi KK (2002) Ascorbate deficiency can limit violaxanthin de-epoxidase activity in vivo. Plant Physiol 128: 970-977**  
Pubmed: [Author and Title](#)  
Google Scholar: [Author Only Title Only Author and Title](#)
- Müller-Moulé P, Havaux M, Niyogi KK (2003) Zeaxanthin deficiency enhances the high light sensitivity of an ascorbate-deficient mutant of *Arabidopsis*. Plant Physiol 133: 748-760.**  
Pubmed: [Author and Title](#)  
Google Scholar: [Author Only Title Only Author and Title](#)
- Nagy V, Vidal-Meireles A, Podmaniczki A, Szentmihályi K, Rákhely G, Zsigmond L, Kovács L, Tóth SZ (2018) The mechanism of photosystem II inactivation during sulphur deprivation-induced H<sub>2</sub> production in *Chlamydomonas reinhardtii*. Plant J 94:548-561**  
Pubmed: [Author and Title](#)  
Google Scholar: [Author Only Title Only Author and Title](#)
- Neupert J, Karcher D, Bock R (2009) Generation of *Chlamydomonas* strains that efficiently express nuclear transgenes. Plant J 57:1140-1150**  
Pubmed: [Author and Title](#)  
Google Scholar: [Author Only Title Only Author and Title](#)
- Niyogi KK, Bjorkman O, Grossmann AR (1997) *Chlamydomonas* xanthophyll cycle mutants identified by video imaging of chlorophyll fluorescence quenching. Plant Cell 9:1369-1380**  
Pubmed: [Author and Title](#)  
Google Scholar: [Author Only Title Only Author and Title](#)
- Peers G, Truong TB, Ostendorf E, Busch A, Elrad D, Grossman AR, Hippler M, Niyogi KK (2009) An ancient light-harvesting protein is**

**critical for the regulation of algal photosynthesis. Nature 462:518-521**

Pubmed: [Author and Title](#)

Google Scholar: [Author Only Title Only Author and Title](#)

**Pinnola A, Dall'Osto L, Gerotto C, Morosinotto T, Bassi R, Alboresi A (2013) Zeaxanthin binds to Light-Harvesting Complex Stress-Related Protein to enhance nonphotochemical quenching in Physcomitrella patens. Plant Cell 25:3519-3534**

Pubmed: [Author and Title](#)

Google Scholar: [Author Only Title Only Author and Title](#)

**Polukhina I, Fristedt R, Dinc E, Cardol P, Croce R (2016) Carbon supply and photoacclimation cross talk in the green alga Chlamydomonas reinhardtii. Plant Physiol 172: 1494-1505**

Pubmed: [Author and Title](#)

Google Scholar: [Author Only Title Only Author and Title](#)

**Porra RJ, Thompson WA, Kriedeman PE (1989) Determination of accurate extinction coefficients and simultaneous equations for assaying chlorophylls-a and -b with four different solvents: verification of the concentration of chlorophyll standards by atomic absorption spectroscopy. Biochim Biophys Acta 975: 384-394**

Pubmed: [Author and Title](#)

Google Scholar: [Author Only Title Only Author and Title](#)

**Quas T, Berteotti S, Ballottari M, Flieger K, Bassi R, Wilhelm C, Goss R (2015) Non-photochemical quenching and xanthophyll cycle activities in six green algal species suggest mechanistic differences in the process of excess energy dissipation. J. Plant Physiol 172: 92-103**

Pubmed: [Author and Title](#)

Google Scholar: [Author Only Title Only Author and Title](#)

**Roach T, Na CS (2017) LHCSR3 affects de-coupling and re-coupling of LHCII to PSII during state transitions in Chlamydomonas reinhardtii. Sci Rep 7: 43145**

Pubmed: [Author and Title](#)

Google Scholar: [Author Only Title Only Author and Title](#)

**Ruban AV, Johnson MP, Duffy CD (2012) The photoprotective molecular switch in the photosystem II antenna. Biochim Biophys Acta 1817:167-181**

Pubmed: [Author and Title](#)

Google Scholar: [Author Only Title Only Author and Title](#)

**Saga G, Giorgetti A, Fufezan C, Giacometti GM, Bassi R, Morosinotto T (2010) Mutation analysis of violaxanthin de-epoxidase identifies substrate-binding sites and residues involved in catalysis. J Biol Chem 285:23763-23770**

Pubmed: [Author and Title](#)

Google Scholar: [Author Only Title Only Author and Title](#)

**Schroda M, Vallon O, Whitelegge JP, Beck CF, Wollman FA (2001) The chloroplastic GrpE homolog of Chlamydomonas: two isoforms generated by differential splicing. Plant Cell 13:2823-2839**

Pubmed: [Author and Title](#)

Google Scholar: [Author Only Title Only Author and Title](#)

**Smirnoff N (2018) Ascorbic acid metabolism and functions: A comparison of plants and mammals. Free Radic Biol Med. 122:116-129**

Pubmed: [Author and Title](#)

Google Scholar: [Author Only Title Only Author and Title](#)

**Takizawa K, Kanazawa A, Kramer DM (2008) Depletion of stromal Pi induces high 'energy dependent' antenna exciton quenching (qE) by decreasing proton conductivity at CFO-CF1 ATP synthase. Plant Cell Environ 31:235-243**

Pubmed: [Author and Title](#)

Google Scholar: [Author Only Title Only Author and Title](#)

**Tibiletti T, Auroy P, Peltier G, Caffarri S (2016) Chlamydomonas reinhardtii PsbS protein is functional and accumulates rapidly and transiently under high light. Plant Physiol 171:2717-2730**

Pubmed: [Author and Title](#)

Google Scholar: [Author Only Title Only Author and Title](#)

**Tikkanen M, Mekala NR, Aro E-M (2014) Photosystem II photoinhibition-repair cycle protects photosystem I from irreversible damage. Biochim Biophys Acta - Bioenerg 1837: 210-215**

Pubmed: [Author and Title](#)

Google Scholar: [Author Only Title Only Author and Title](#)

**Tóth SZ, Puthur JT, Nagy V, Garab G (2009) Experimental evidence for ascorbate-dependent electron transport in leaves with inactive oxygen-evolving complexes. Plant Physiol 149: 1568-1578**

Pubmed: [Author and Title](#)

Google Scholar: [Author Only Title Only Author and Title](#)

**Tóth SZ, Nagy V, Puthur JT, Kovács L, Garab G (2011) The physiological role of ascorbate as photosystem II electron donor: Protection against photoinactivation in heat-stressed leaves. Plant Physiol 156: 382-392**

Pubmed: [Author and Title](#)

Google Scholar: [Author Only Title Only Author and Title](#)



**Tóth SZ, Lőrincz T, Szarka A (2018) Concentration does matter: The beneficial and potentially harmful effects of ascorbate in humans and plants. *Antioxid Redox Signal* 29:1516-1533**

Pubmed: [Author and Title](#)

Google Scholar: [Author Only](#) [Title Only](#) [Author and Title](#)

**Ünlü C, Drop B, Croce R, van Amerongen H (2014) State transitions in *Chlamydomonas reinhardtii* strongly modulate the functional size of photosystem II but not of photosystem I. *Proc Natl Acad Sci USA* 111:3460-3465**

Pubmed: [Author and Title](#)

Google Scholar: [Author Only](#) [Title Only](#) [Author and Title](#)

**Urzica EI, Adler LN, Page MD, Linster CL, Arbing MA, Casero D, Pellegrini M, Merchant SS, Clarke SG (2012) Impact of oxidative stress on ascorbate biosynthesis in *Chlamydomonas* via regulation of the VTC2 gene encoding a GDP-L-galactose phosphorylase. *J Biol Chem* 287: 14234-14245**

Pubmed: [Author and Title](#)

Google Scholar: [Author Only](#) [Title Only](#) [Author and Title](#)

**Vidal-Meireles A, Neupert J, Zsigmond L, Rosado-Souza L, Kovács L, Nagy V, Galambos A, Fernie AR, Bock R, Tóth SZ (2017) Regulation of ascorbate biosynthesis in green algae has evolved to enable rapid stress-induced response via the VTC2 gene encoding GDP- L -galactose phosphorylase. *New Phytol* 214: 668-681**

Pubmed: [Author and Title](#)

Google Scholar: [Author Only](#) [Title Only](#) [Author and Title](#)

**Voigt J, Münzner P (1994) Blue light-induced lethality of a cell wall-deficient mutant of the unicellular green alga *Chlamydomonas reinhardtii*. *Plant Cell Physiol* 35: 99-106**

Pubmed: [Author and Title](#)

Google Scholar: [Author Only](#) [Title Only](#) [Author and Title](#)

**Wang Z, Xiao Y, Chen W, Tang K, Zhang L (2010) Increased vitamin C content accompanied by an enhanced recycling pathway confers oxidative stress tolerance in *Arabidopsis*. *J. Integr. Plant Biol* 52: 400-409**

Pubmed: [Author and Title](#)

Google Scholar: [Author Only](#) [Title Only](#) [Author and Title](#)

**Wheeler G, Ishikawa T, Pornsaksit V, Smirnov N (2015) Evolution of alternative biosynthetic pathways for vitamin C following plastid acquisition in photosynthetic eukaryotes. *eLife* 4:e06369**

Pubmed: [Author and Title](#)

Google Scholar: [Author Only](#) [Title Only](#) [Author and Title](#)

**Xue H, Tokutsu R, Bergner SV, Scholz M, Minagawa J, Hippler M (2015) Photosystem II subunit R is required for efficient binding of Light-Harvesting Complex Stress-Related Protein 3 to photosystem II-light-harvesting supercomplexes in *Chlamydomonas reinhardtii*. *Plant Physiol* 167: 1566-1578**

Pubmed: [Author and Title](#)

Google Scholar: [Author Only](#) [Title Only](#) [Author and Title](#)

**Zechmann B, Stumpe M, Mauch F (2011) Immunocytochemical determination of the subcellular distribution of ascorbate in plants. *Planta* 233: 1-12**

Pubmed: [Author and Title](#)

Google Scholar: [Author Only](#) [Title Only](#) [Author and Title](#)
